# Supplementary material for: The effect of RO3201195 and a pyrazolyl ketone P38 MAPK inhibitor library on the proliferation of Werner syndrome cells
Source: Royal Society of Chemistry journal article supplement (doi:10.1039/c5ob02229k), 2015-11-12

## Supporting Information

# The Effect of RO3201195 and a Pyrazolyl Ketone P38 MAPK Inhibitor Library on the Proliferation of Werner Syndrome Cells

Mark C. Bagley,<sup>\*a</sup> Jessica E. Dwyer,<sup>a</sup> Mohammed Baashen,<sup>a</sup> Matthew C. Dix,<sup>b</sup> Paola G. S. Murziani,<sup>b</sup> Michal J. Rokicki,<sup>c</sup> David Kipling,<sup>c</sup> and Terence Davis<sup>\*c</sup>

### Contents

- S2 <sup>1</sup>H NMR spectrum for methyl 3-methoxybenzoate (**9**)  
S3 <sup>13</sup>C NMR spectrum for methyl 3-methoxybenzoate (**9**)  
S4 <sup>1</sup>H NMR spectrum for methyl 3-methoxybenzoylacetonitrile (**6**)  
S5 <sup>13</sup>C NMR spectrum for methyl 3-methoxybenzoylacetonitrile (**6**)  
S6 <sup>1</sup>H NMR spectrum for (*Z*)-3-methoxy-3-(3-methoxyphenyl)prop-2-enenitrile (**7**)  
S7 <sup>13</sup>C NMR spectrum for (*Z*)-3-methoxy-3-(3-methoxyphenyl)prop-2-enenitrile (**7**)  
S8 <sup>1</sup>H NMR spectrum for (*E*)-3-methoxy-3-(3-methoxyphenyl)prop-2-enenitrile (**7**)  
S9 <sup>13</sup>C NMR spectrum for (*E*)-3-methoxy-3-(3-methoxyphenyl)prop-2-enenitrile (**7**)  
S10 <sup>1</sup>H NMR spectrum for 2-(3-methoxybenzoyl)-3-(phenylamino)prop-2-enenitrile (**11**)  
S11 <sup>13</sup>C NMR spectrum for 2-(3-methoxybenzoyl)-3-(phenylamino)prop-2-enenitrile (**11**)  
S12 <sup>1</sup>H NMR spectrum for [5-amino-1-(4-fluorophenyl)-1*H*-pyrazol-4-yl]-3-methoxyphenyl ketone (**12**)  
S13 <sup>13</sup>C NMR spectrum for [5-amino-1-(4-fluorophenyl)-1*H*-pyrazol-4-yl]-3-methoxyphenyl ketone (**12**)  
S14 <sup>1</sup>H NMR spectrum for [5-amino-1-(4-fluorophenyl)-1*H*-pyrazol-4-yl]-3-hydroxyphenyl ketone (**13**)  
S15 <sup>13</sup>C NMR spectrum for [5-amino-1-(4-fluorophenyl)-1*H*-pyrazol-4-yl]-3-hydroxyphenyl ketone (**13**)  
S16 <sup>1</sup>H NMR spectrum for [5-amino-1-(4-fluorophenyl)-1*H*-pyrazol-4-yl]{3-[(*R*)-2,2-dimethyl-1,3-dioxolan-4-yl)methoxy]phenyl} ketone (**15**)  
S17 <sup>13</sup>C NMR spectrum for [5-amino-1-(4-fluorophenyl)-1*H*-pyrazol-4-yl]{3-[(*R*)-2,2-dimethyl-1,3-dioxolan-4-yl)methoxy]phenyl} ketone (**15**)  
S18 <sup>1</sup>H NMR spectrum for 5-amino-1-(4-fluorophenyl)-4-{3-[2(*S*)-3-dihydroxypropoxy]benzoyl}pyrazole (RO3201195) (**1**)  
S19 <sup>13</sup>C NMR spectrum for 5-amino-1-(4-fluorophenyl)-4-{3-[2(*S*)-3-dihydroxypropoxy]benzoyl}pyrazole (RO3201195) (**1**)

Spectra published using ACD/NMR Processor Academic Edition and ACD/Chemsketch (Freeware), version 12.01, Advanced Chemistry Development, Inc., Toronto, On, Canada, www.acdlabs.com, 2015

<sup>1</sup>H NMR Spectrum (500 MHz, CDCl<sub>3</sub>) for methyl 3-methoxybenzoate (**9**)

B04JD031B Proton for Carbon.esp

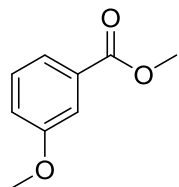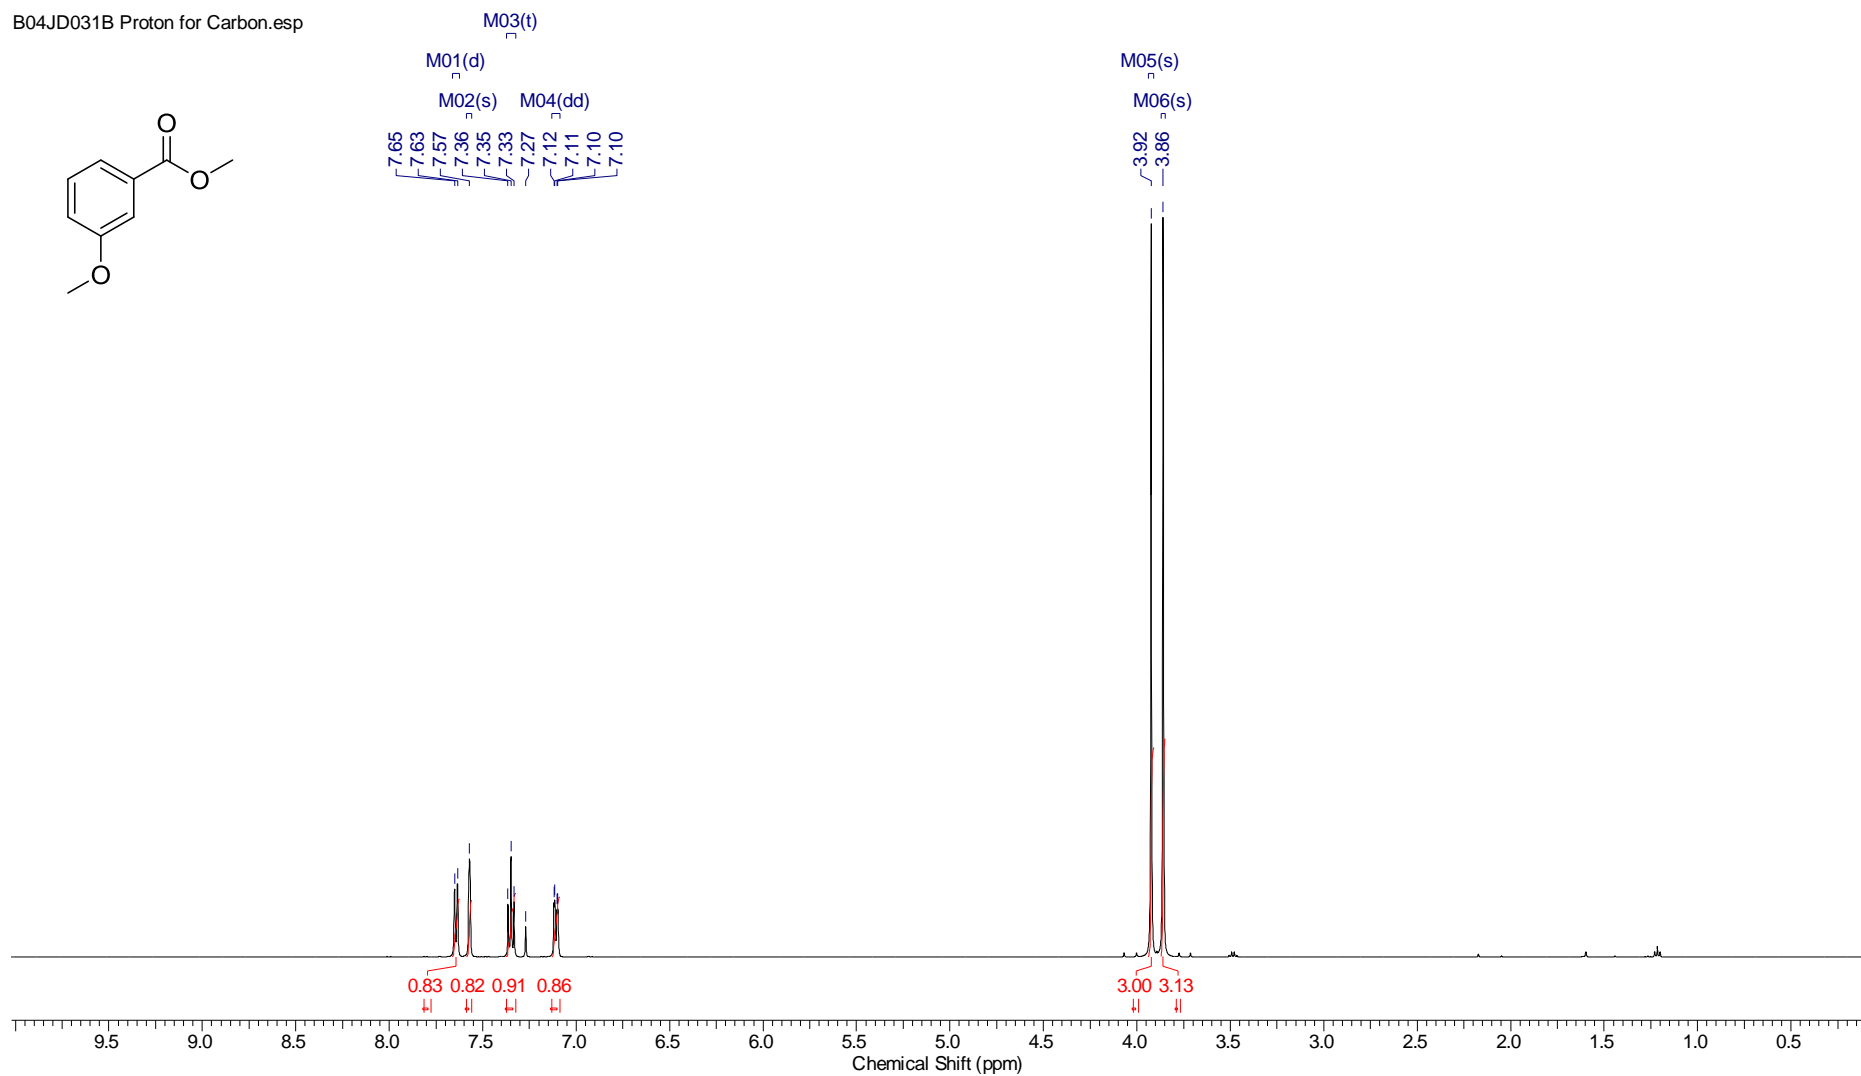

<sup>13</sup>C NMR spectrum (126 MHz, CDCl<sub>3</sub>) for methyl 3-methoxybenzoate (9)

B04JD031B CARBON\_01.esp

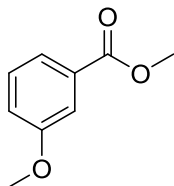

— 166.93

— 159.61

— 131.51

— 129.34

— 121.98

— 119.48

— 114.04

— 77.00

— 55.41

— 52.09

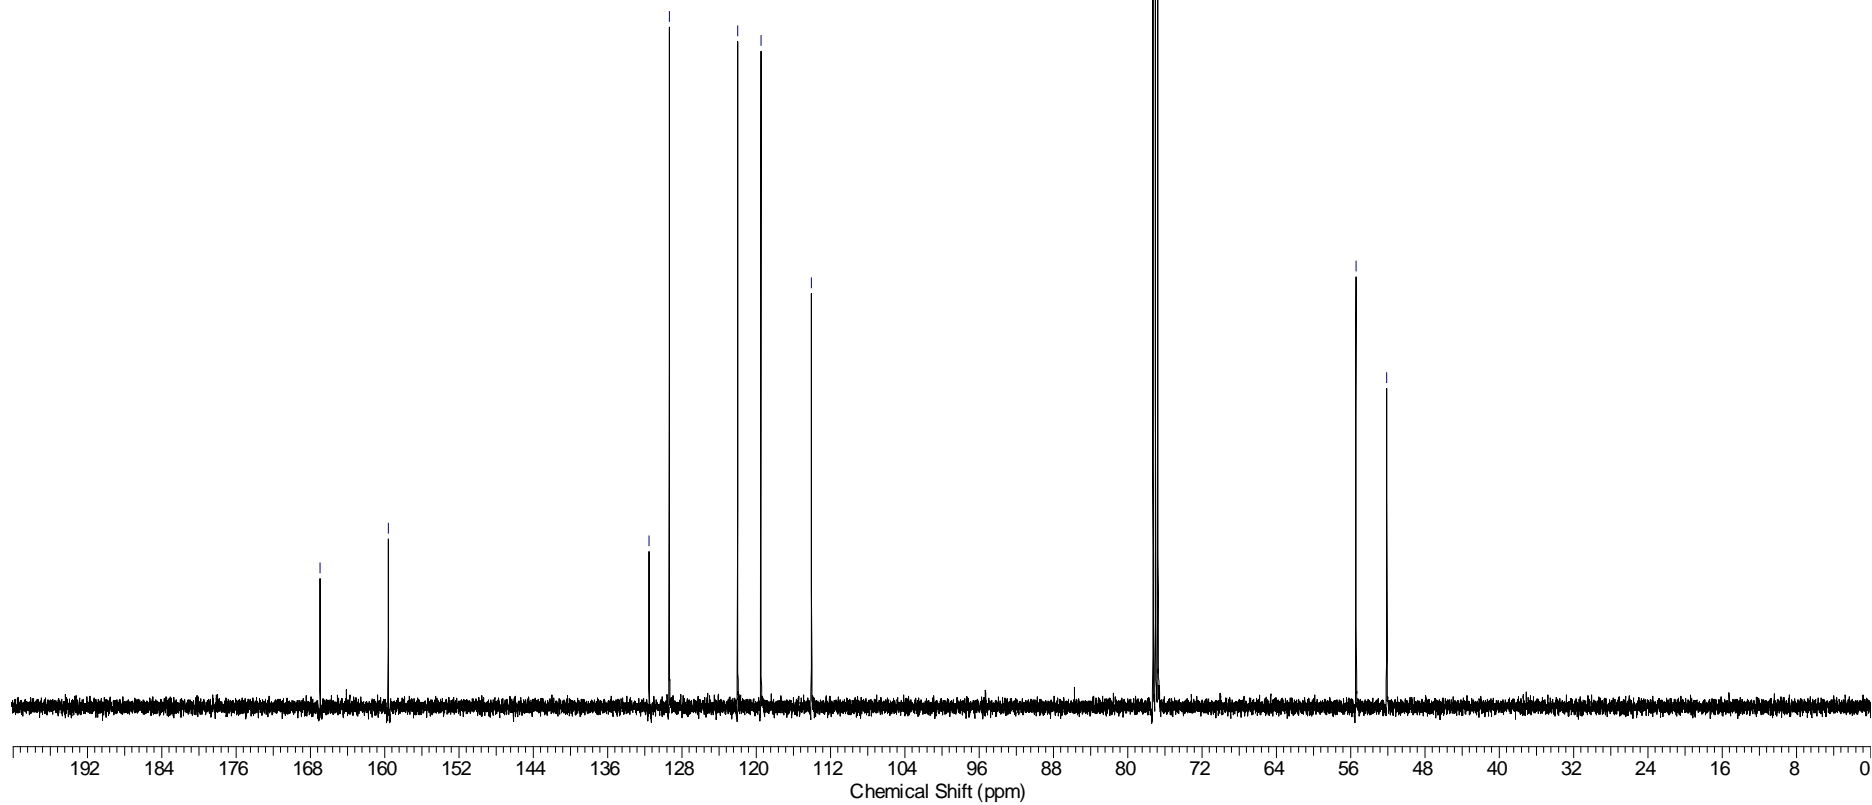

<sup>1</sup>H NMR Spectrum (500 MHz, CDCl<sub>3</sub>) for methyl 3-methoxybenzoylacetonitrile (6)

B04JD033B CDCl<sub>3</sub>.esp

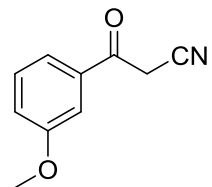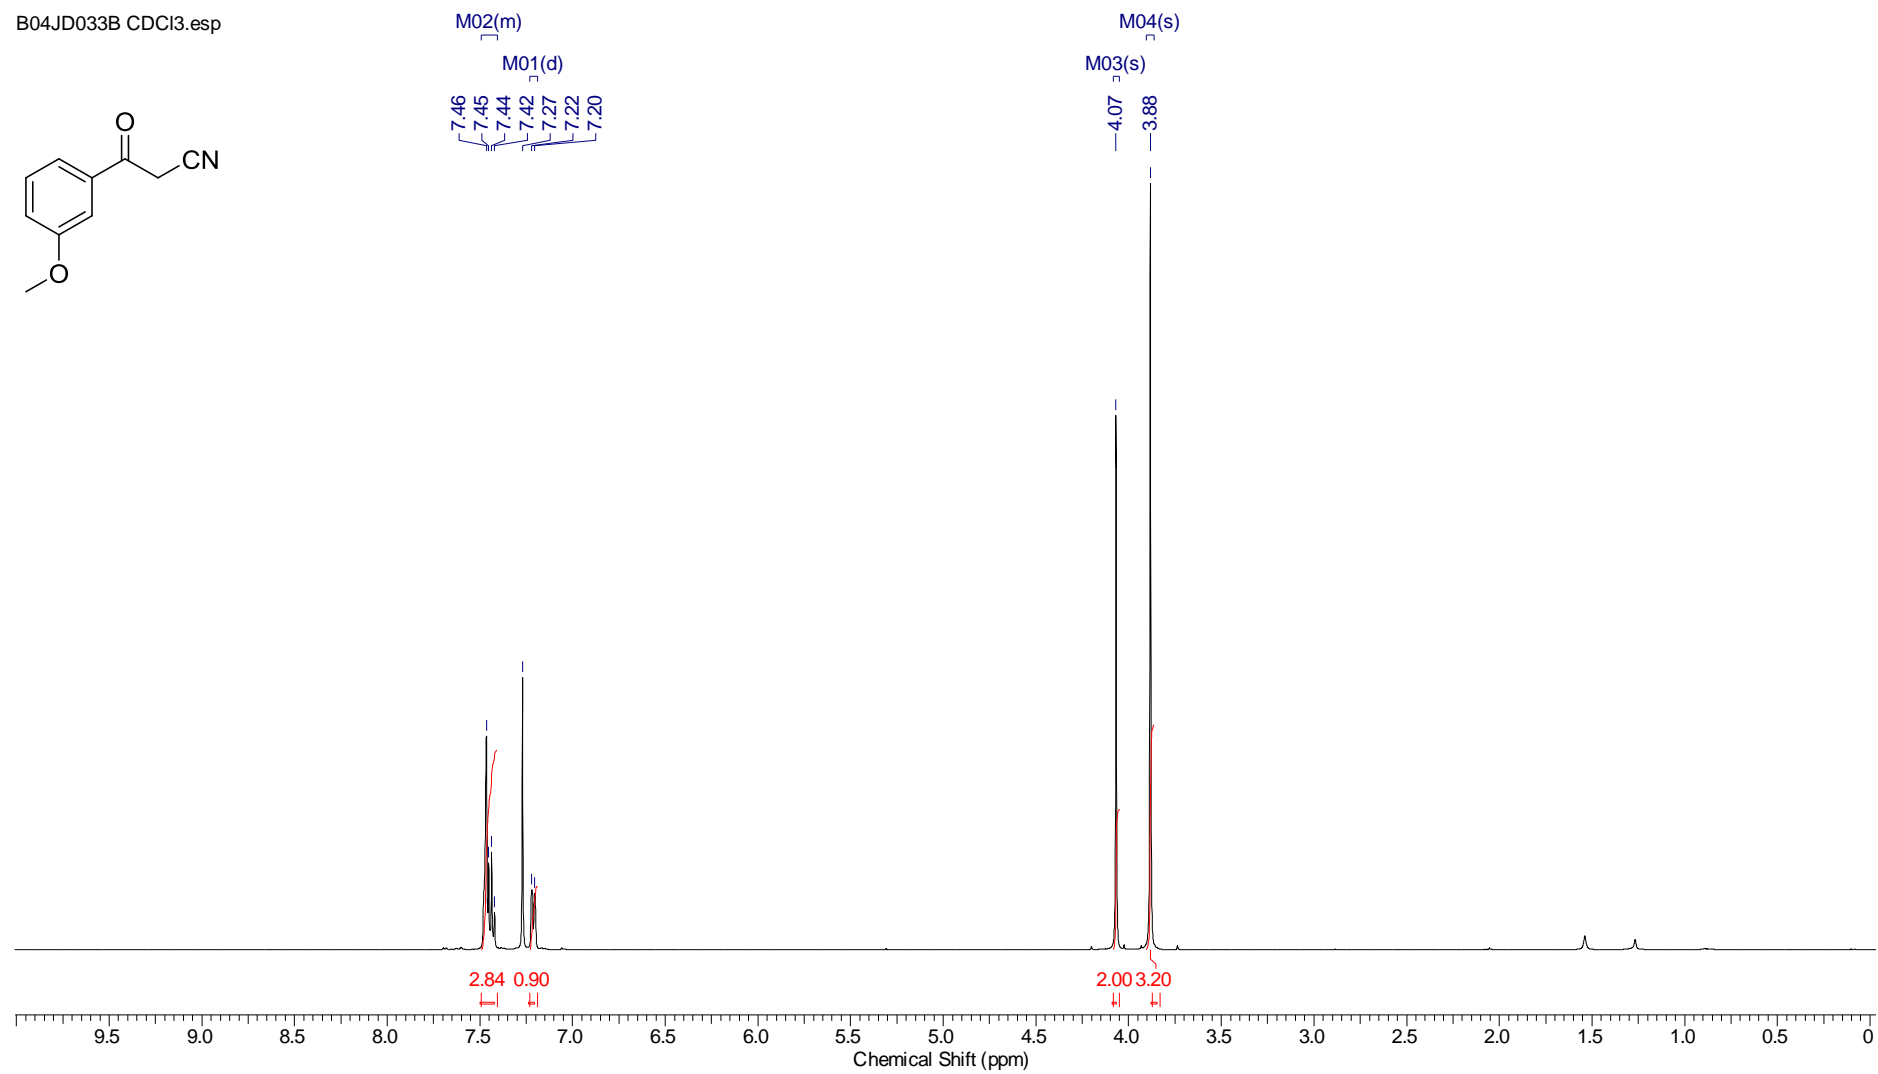

<sup>13</sup>C NMR Spectrum (126 MHz, CDCl<sub>3</sub>) for methyl 3-methoxybenzoylacetonitrile (**6**)

B04JD033B DCl3 CARBON\_01.esp

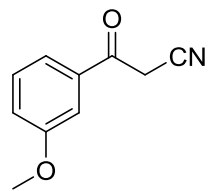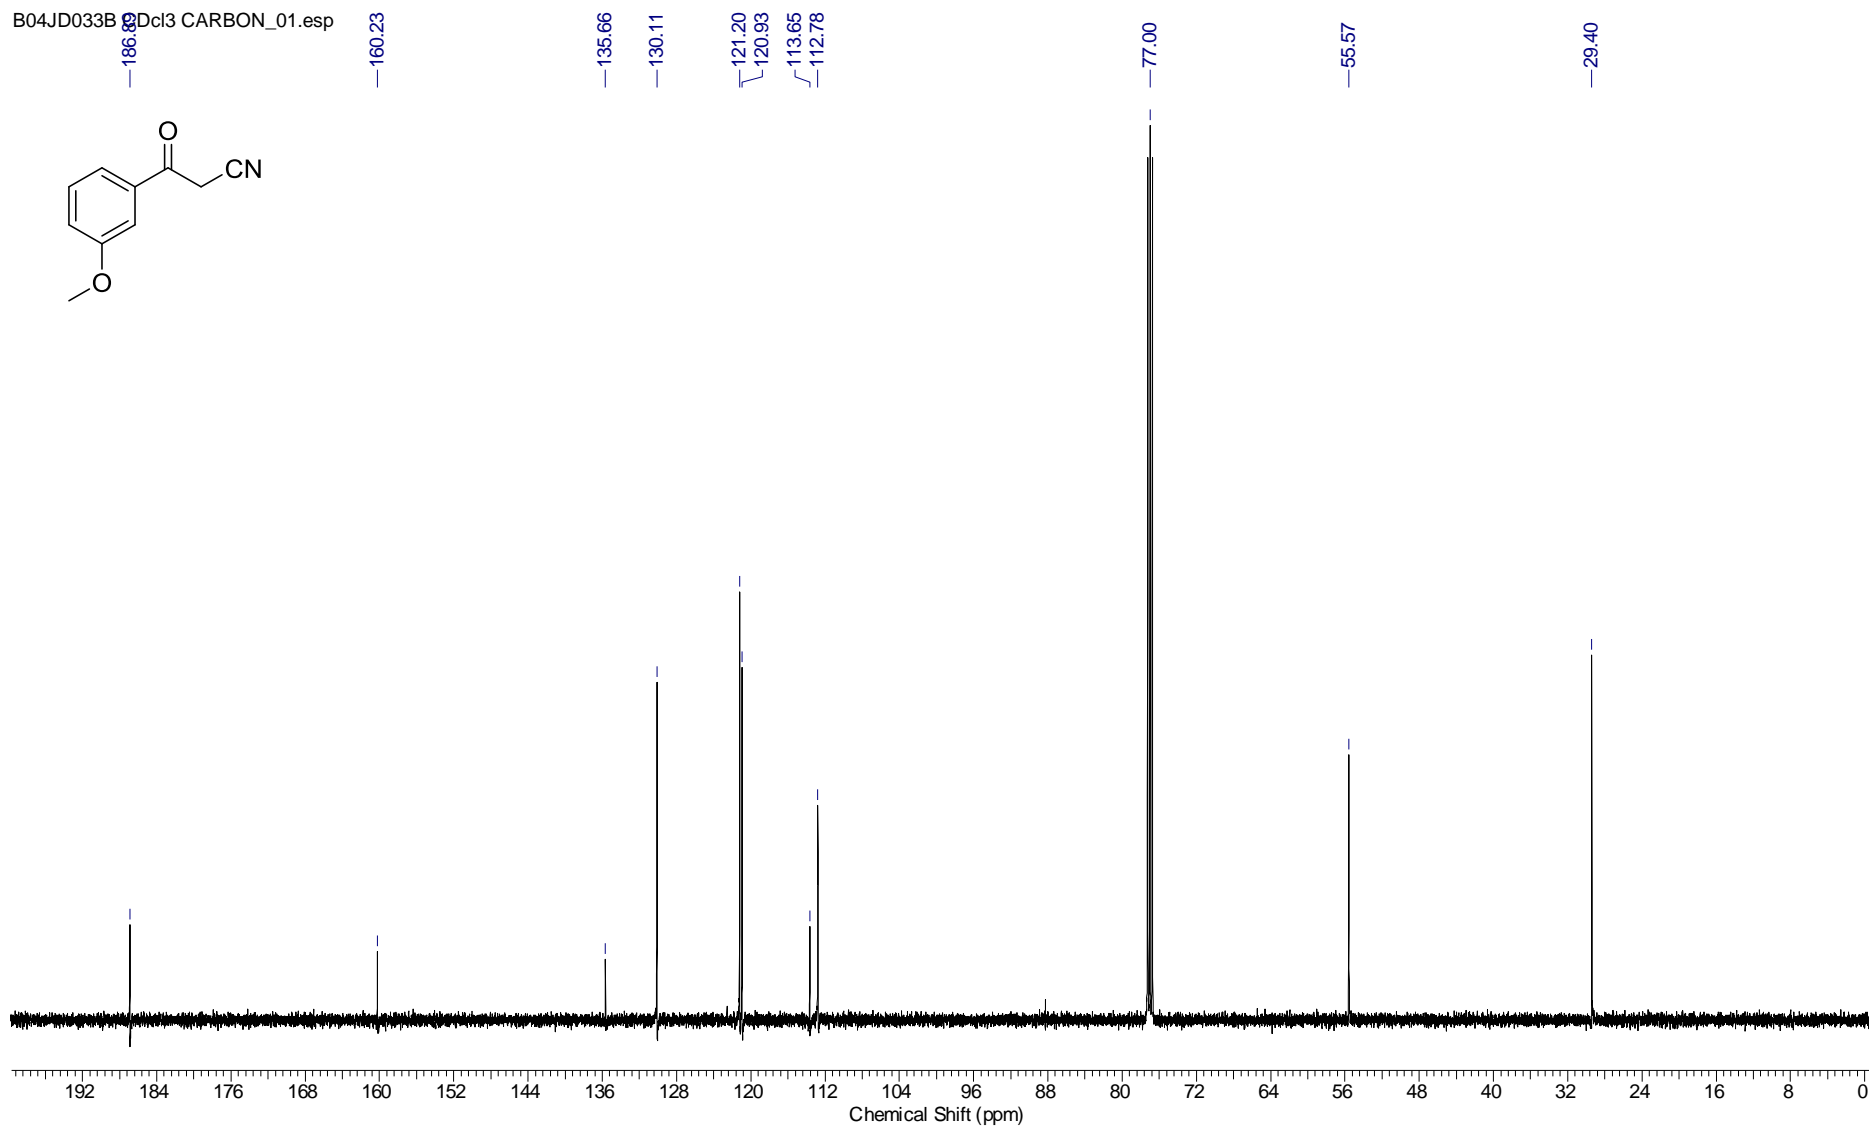

<sup>1</sup>H NMR Spectrum (500 MHz, CDCl<sub>3</sub>) for (Z)-3-methoxy-3-(3-methoxyphenyl)prop-2-enitrile (**7**)

B04JD059\_F1 .esp

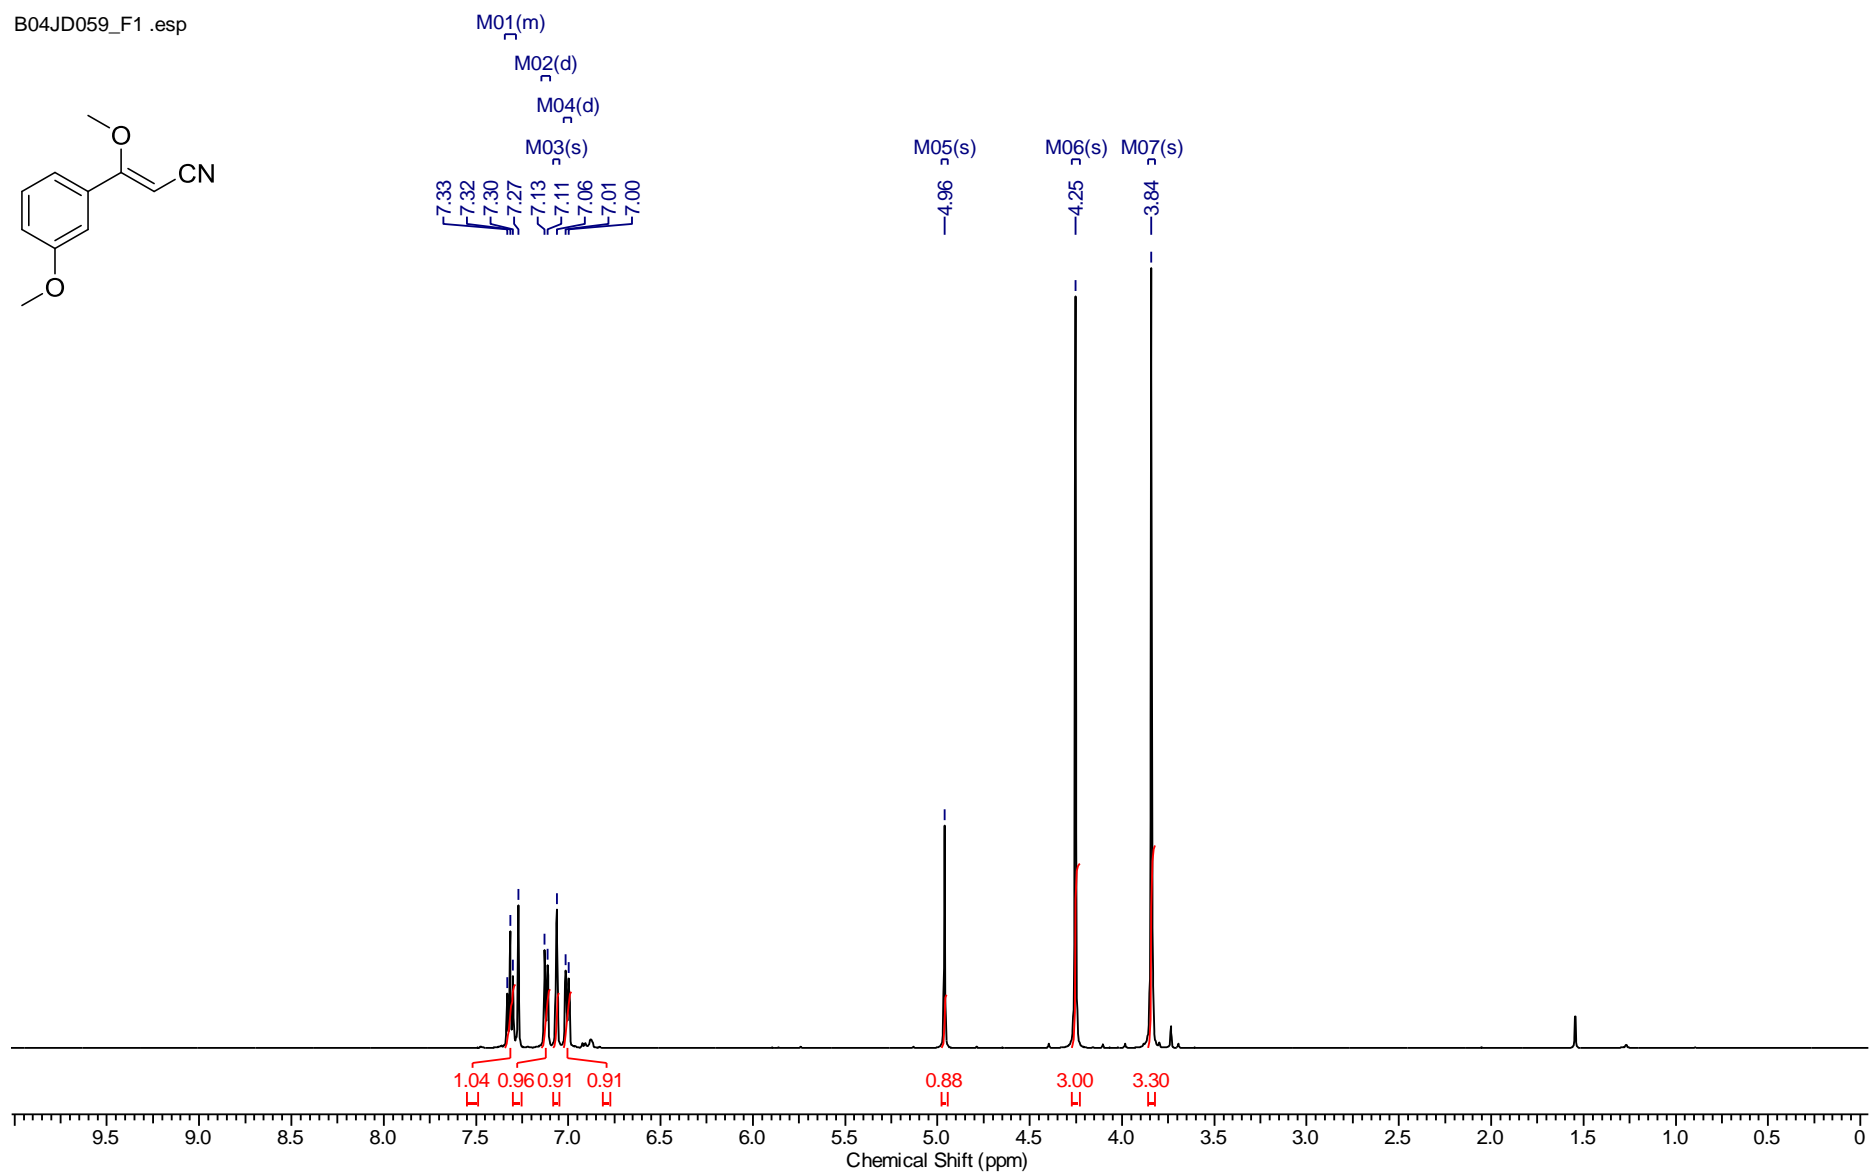

<sup>13</sup>C NMR Spectrum (126 MHz, CDCl<sub>3</sub>) for (Z)-3-methoxy-3-(3-methoxyphenyl)prop-2-enitrile (**7**)

B04JD059\_F1 carbon.esp

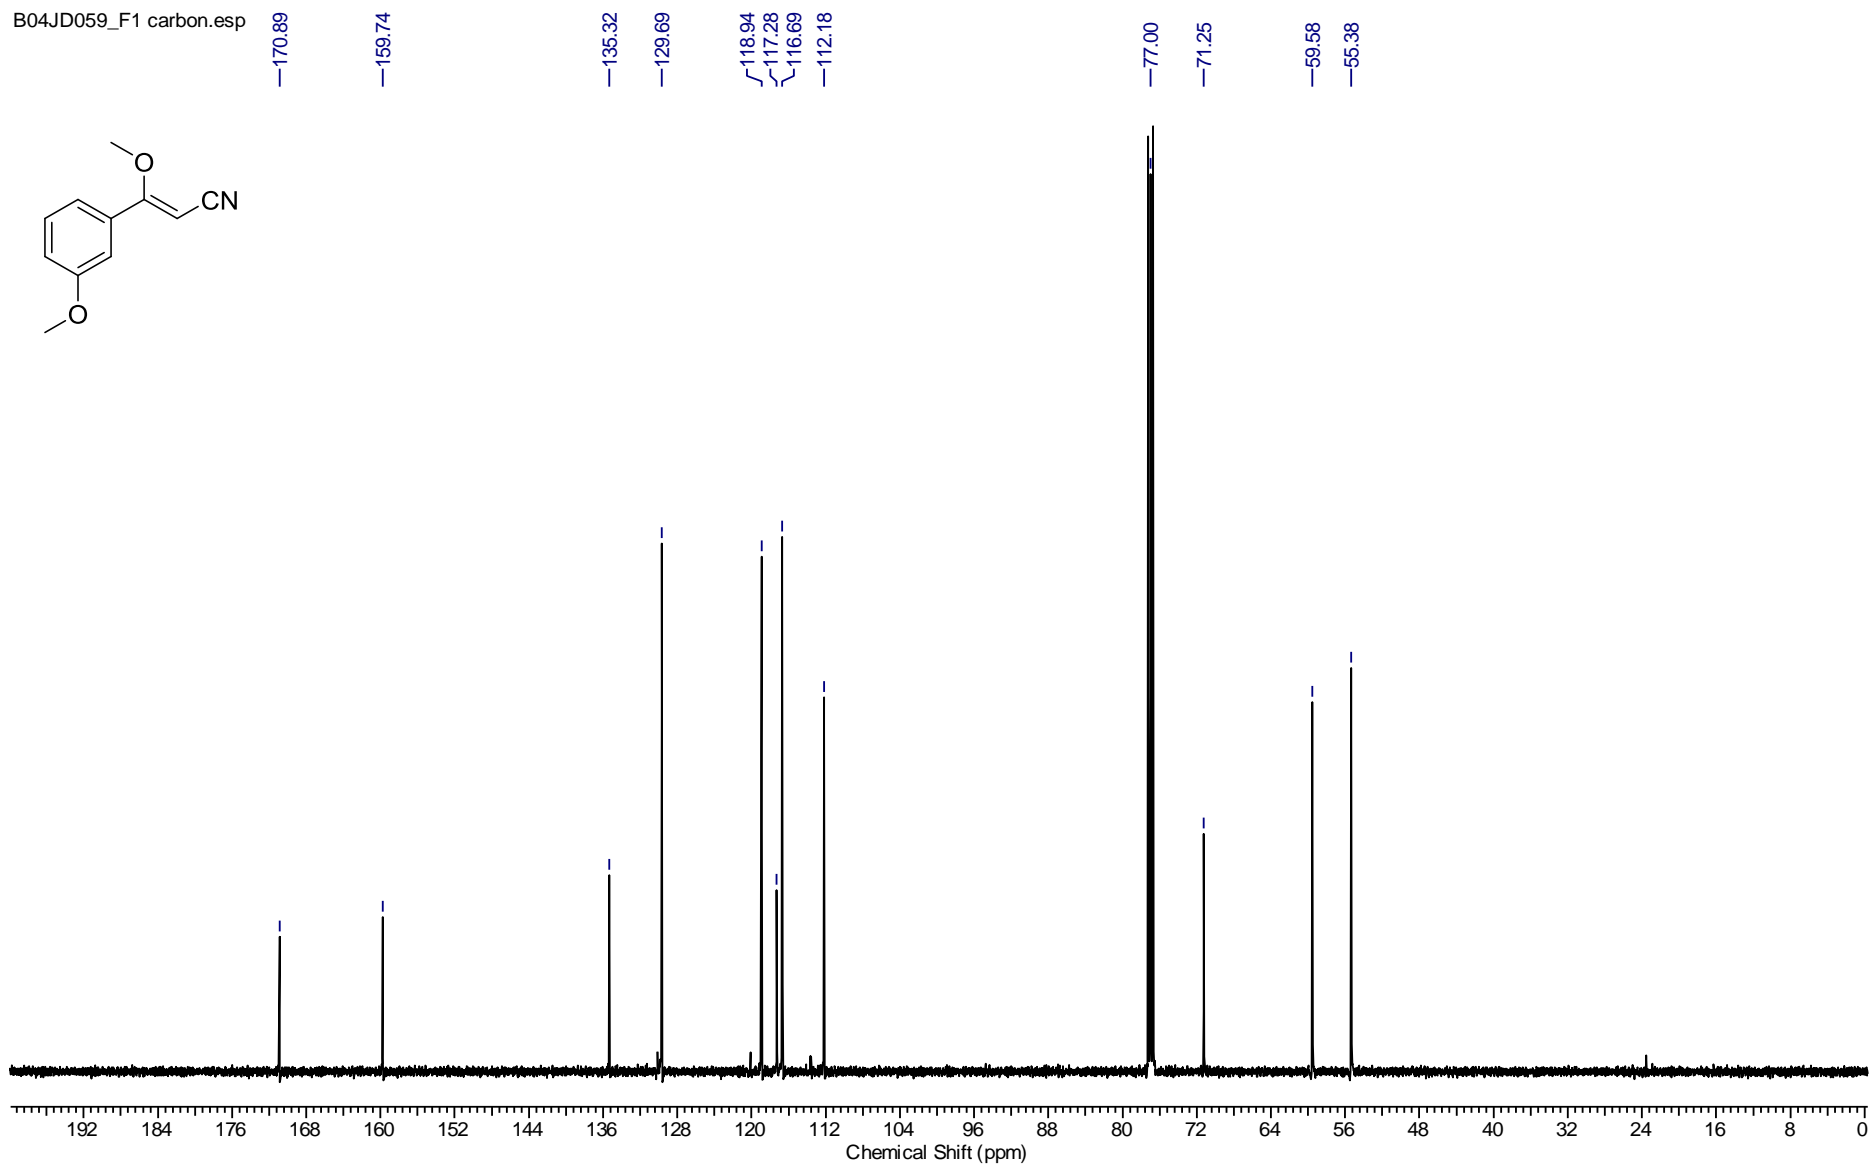

<sup>1</sup>H NMR Spectrum (500 MHz, CDCl<sub>3</sub>) for (*E*)-3-methoxy-3-(3-methoxyphenyl)prop-2-enitrile (**7**)

B04JD060\_F4.esp

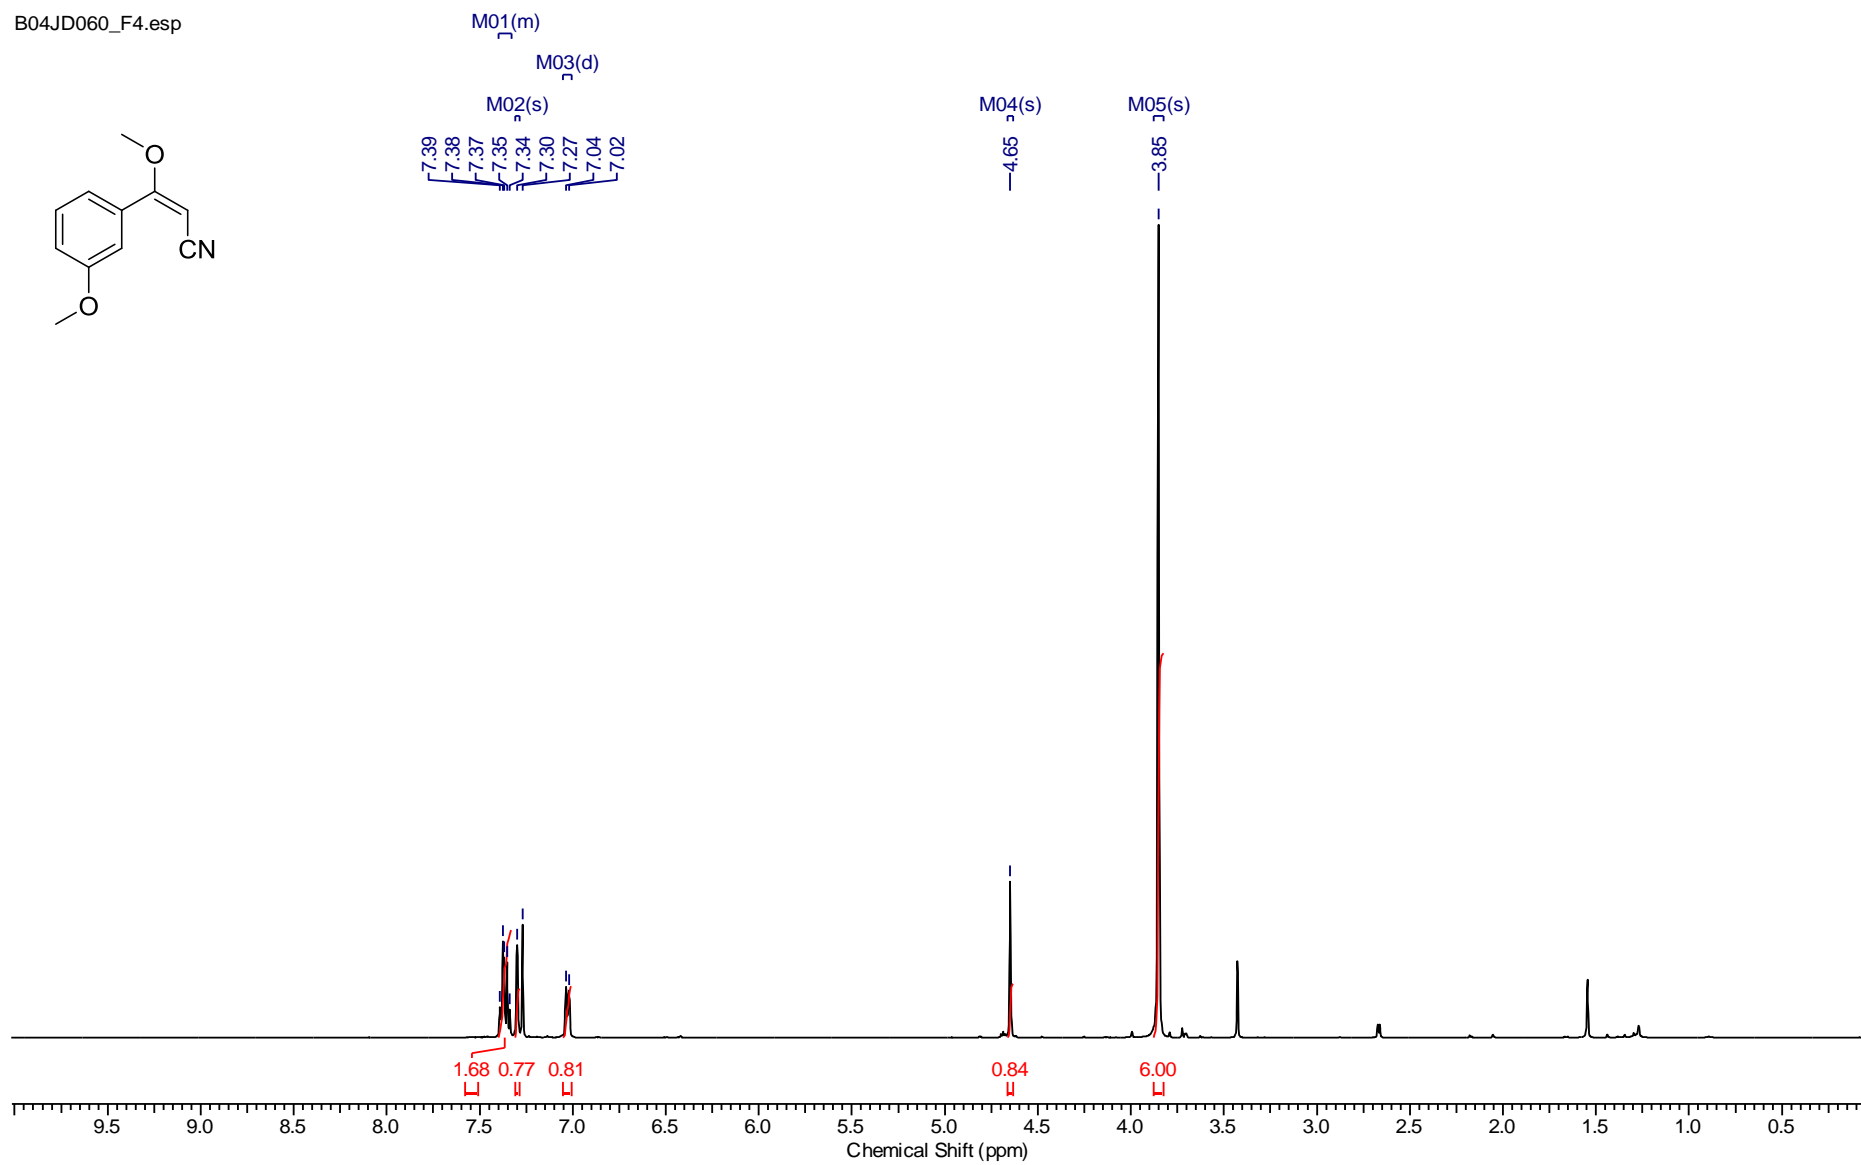



<sup>13</sup>C NMR Spectrum (126 MHz, CDCl<sub>3</sub>) for (*E*)-3-methoxy-3-(3-methoxyphenyl)prop-2-enitrile (**7**)

B04JD055\_F3 acid wash CARBON 400.01p

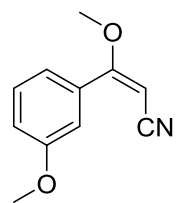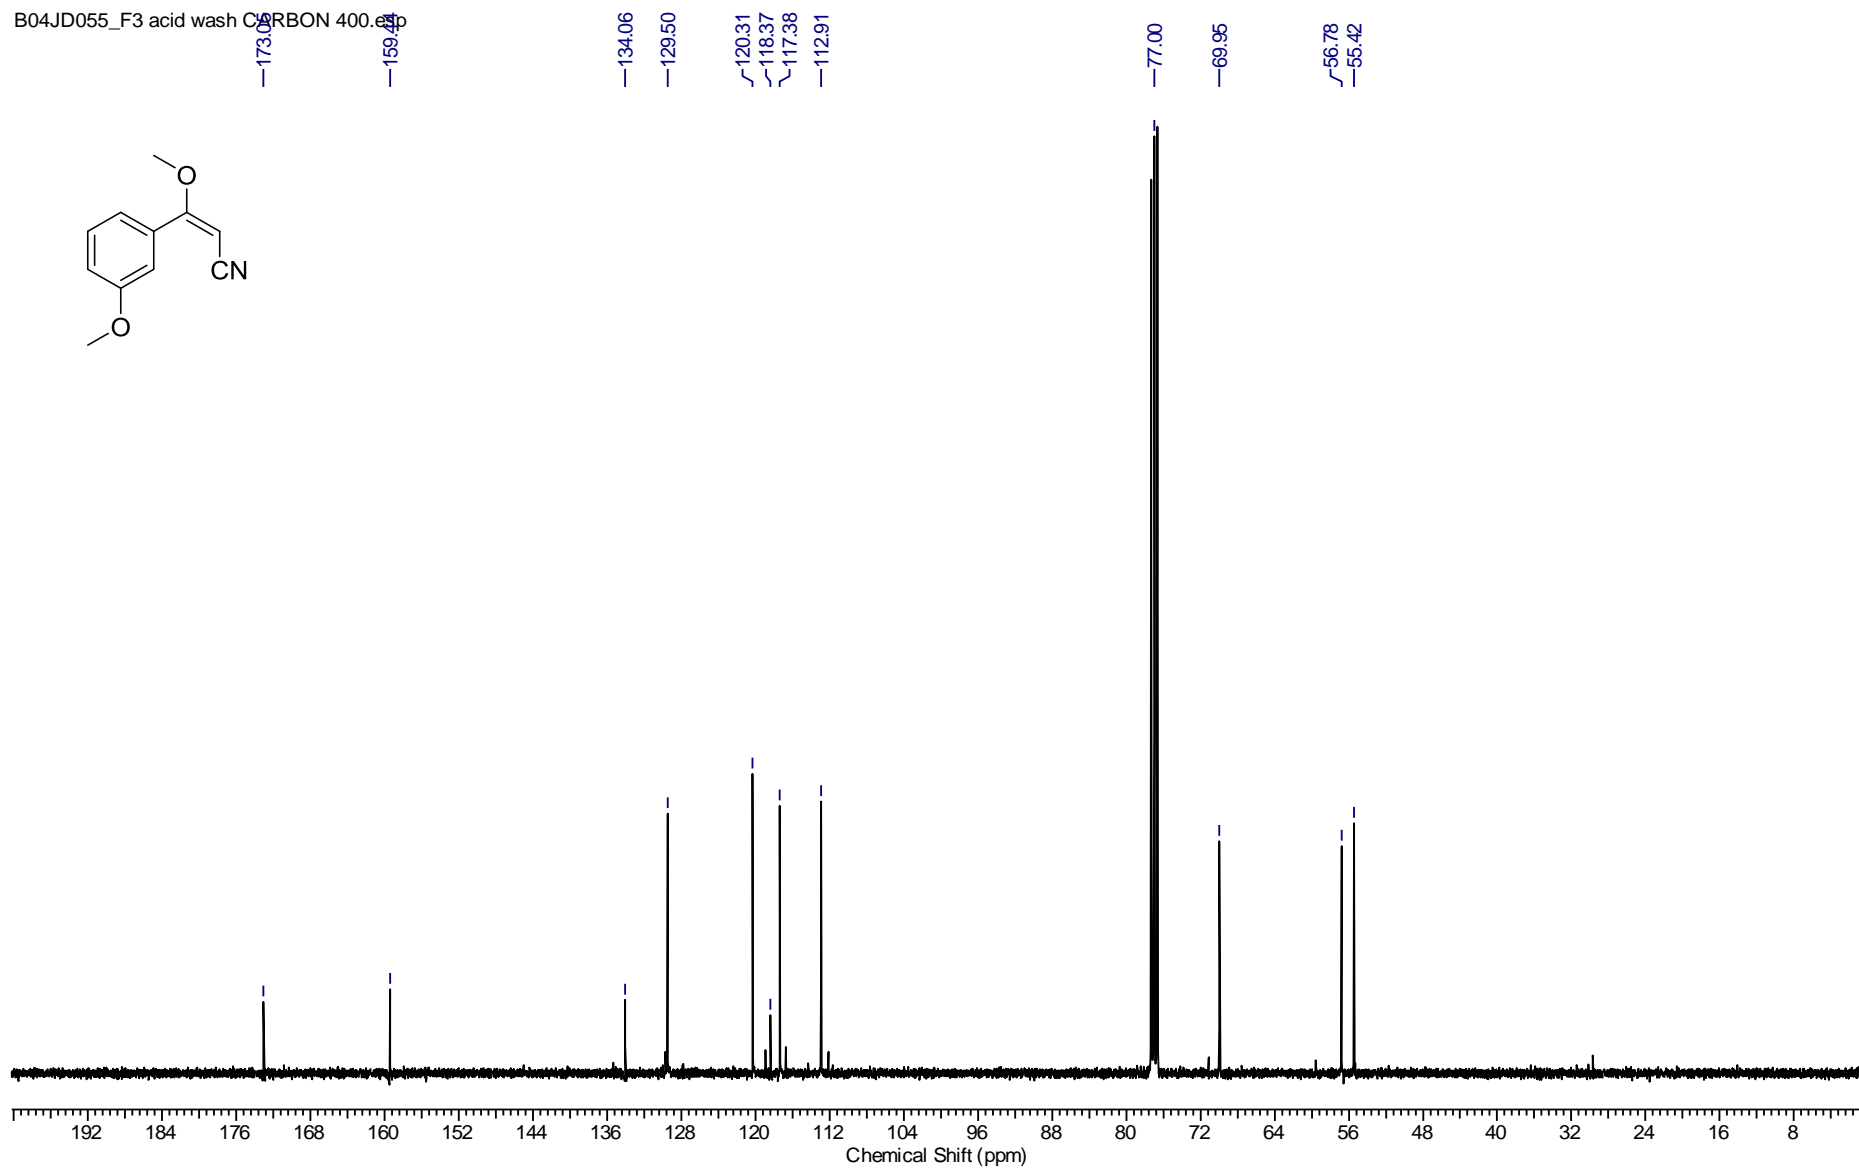

<sup>1</sup>H NMR Spectrum (500 MHz, CDCl<sub>3</sub>) for 2-(3-methoxybenzoyl)-3-(phenylamino)prop-2-enitrile (**11**)

B04JD046A.esp

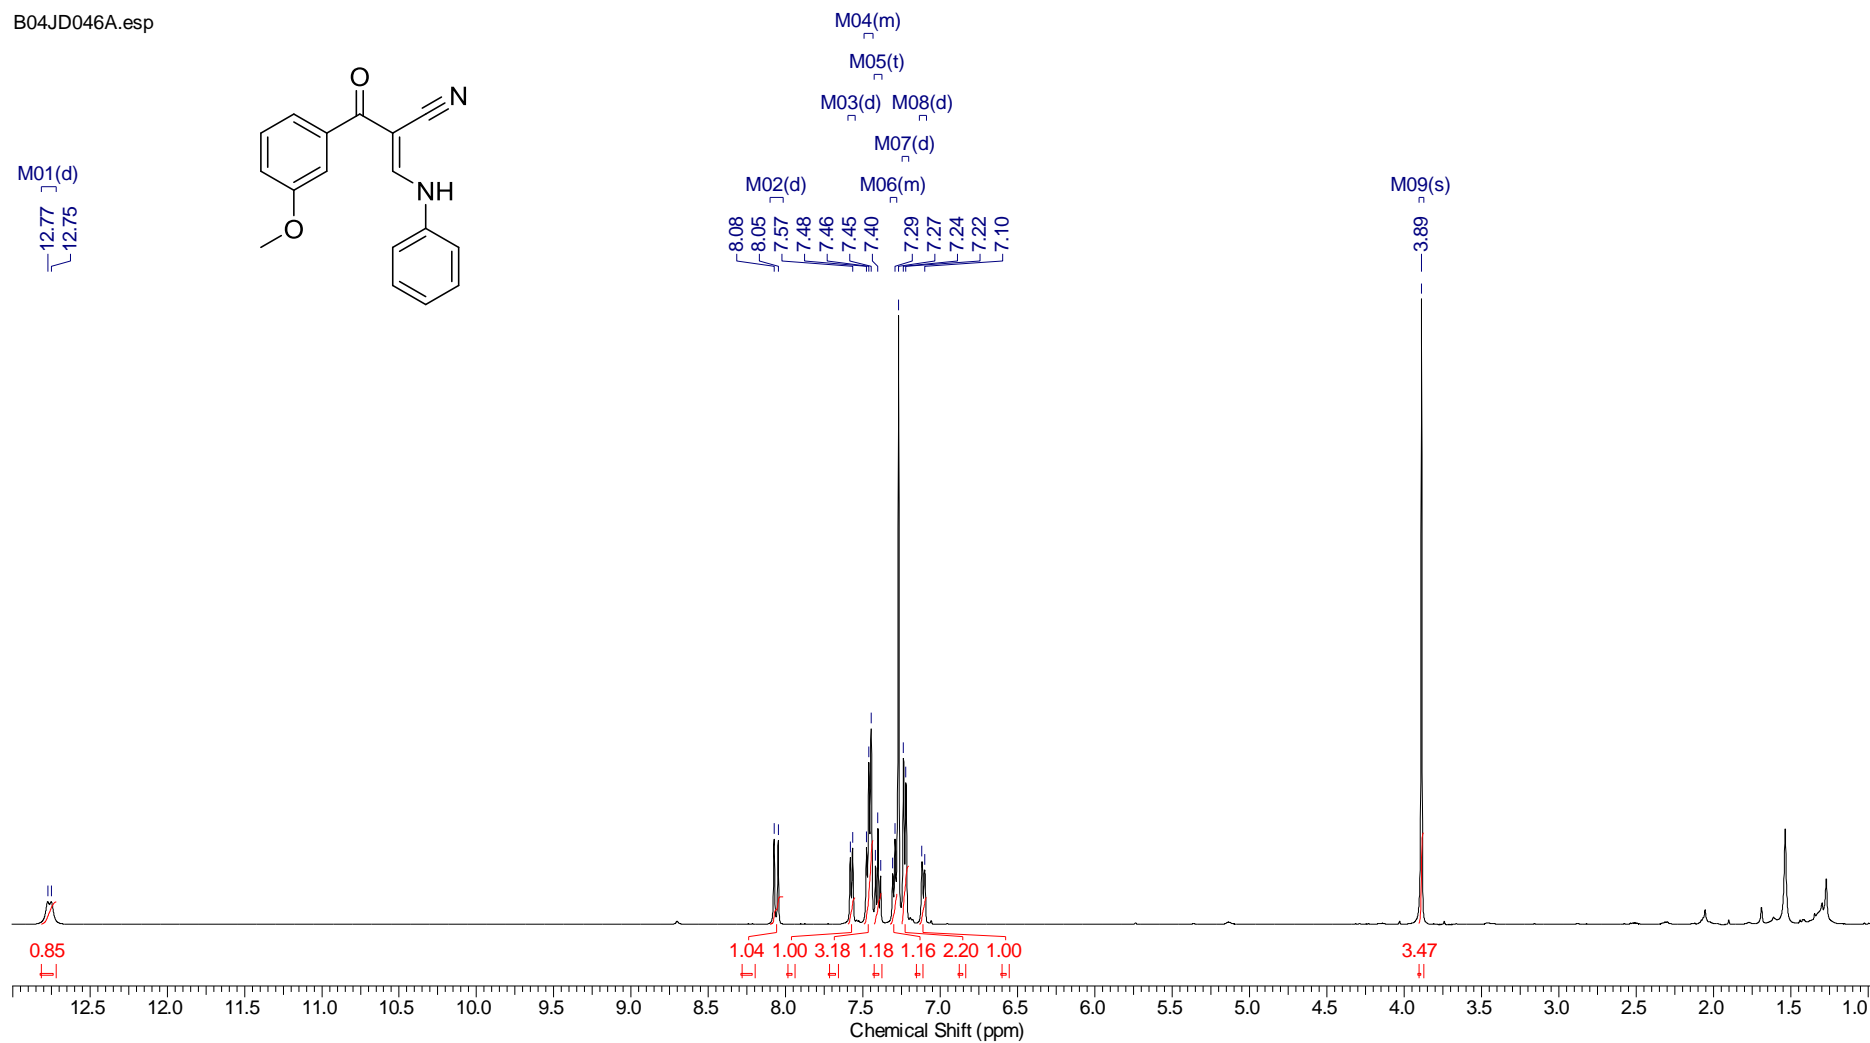

<sup>13</sup>C NMR Spectrum (126 MHz, CDCl<sub>3</sub>) for 2-(3-methoxybenzoyl)-3-(phenylamino)prop-2-enitrile (**11**)

B04JD006B Carbon .esp

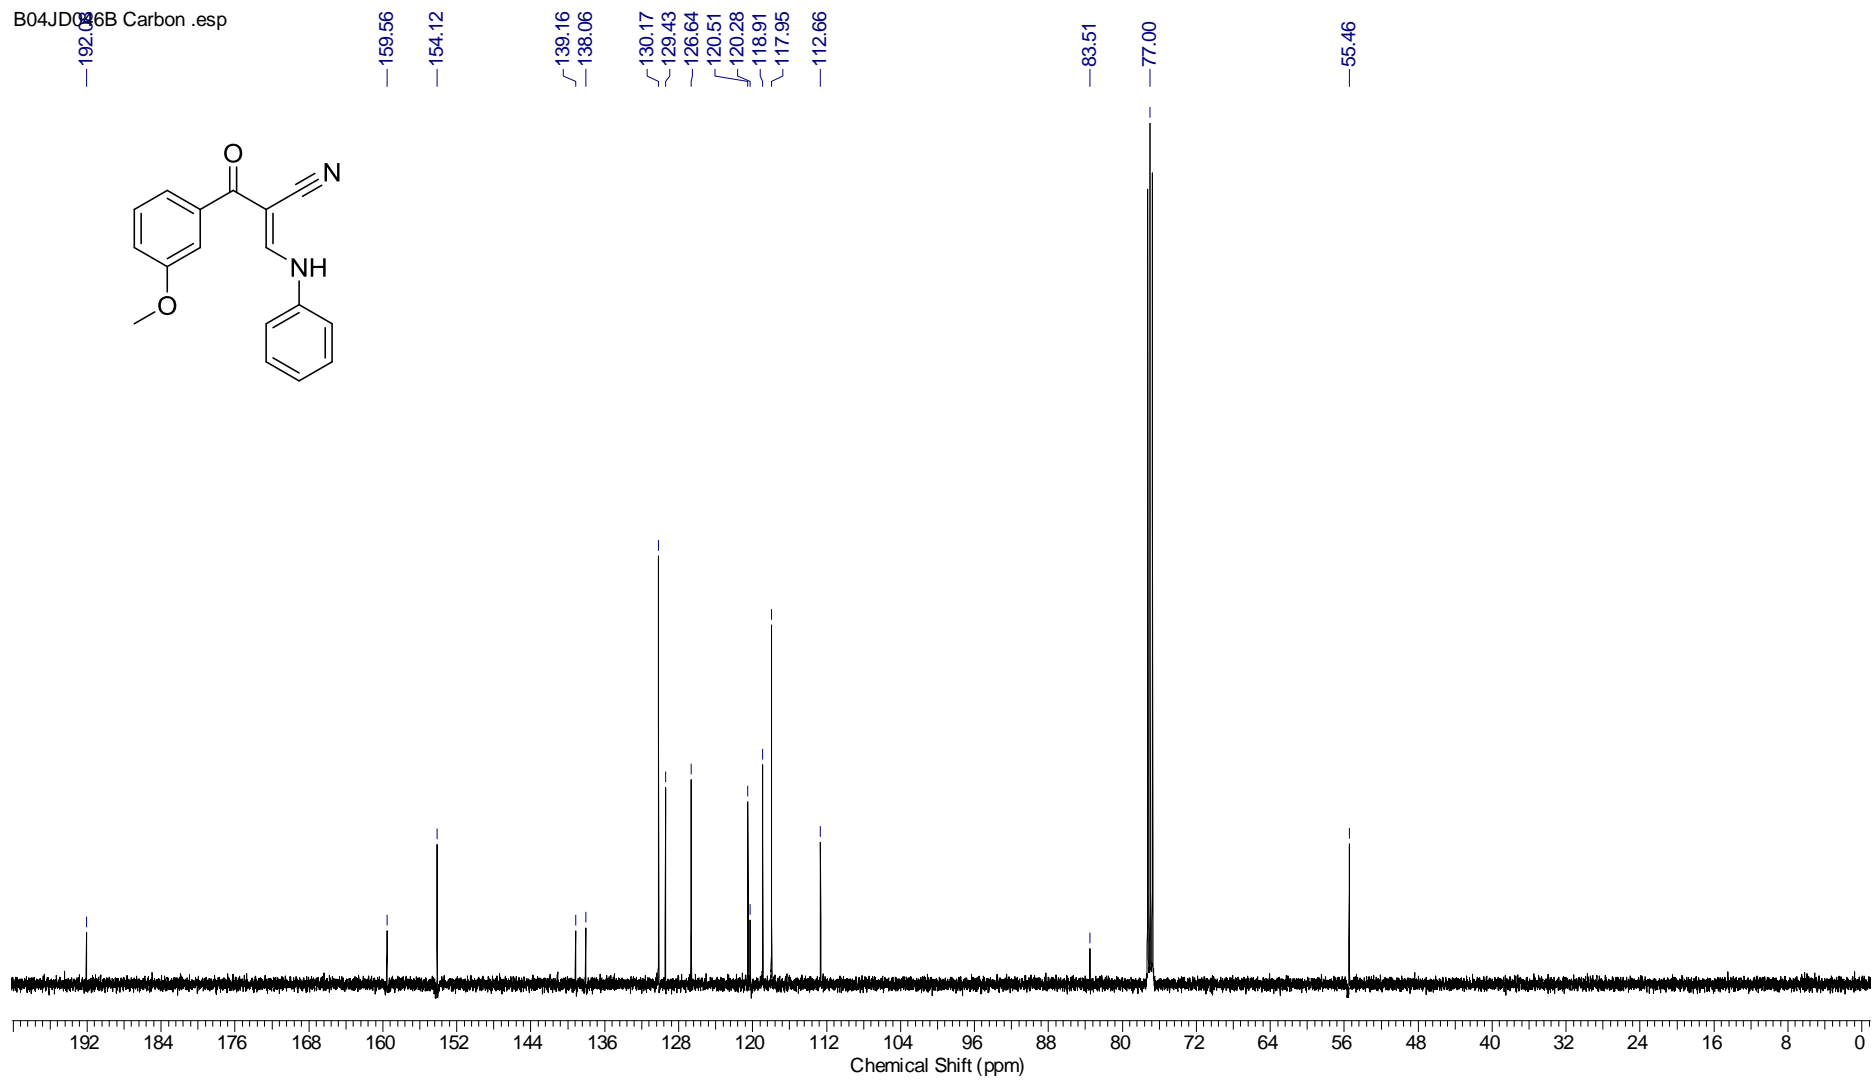

<sup>1</sup>H NMR spectrum (500 MHz, CDCl<sub>3</sub>) for [5-amino-1-(4-fluorophenyl)-1H-pyrazol-4-yl]-3-methoxyphenyl ketone (**12**)

B04JD053\_F2.esp

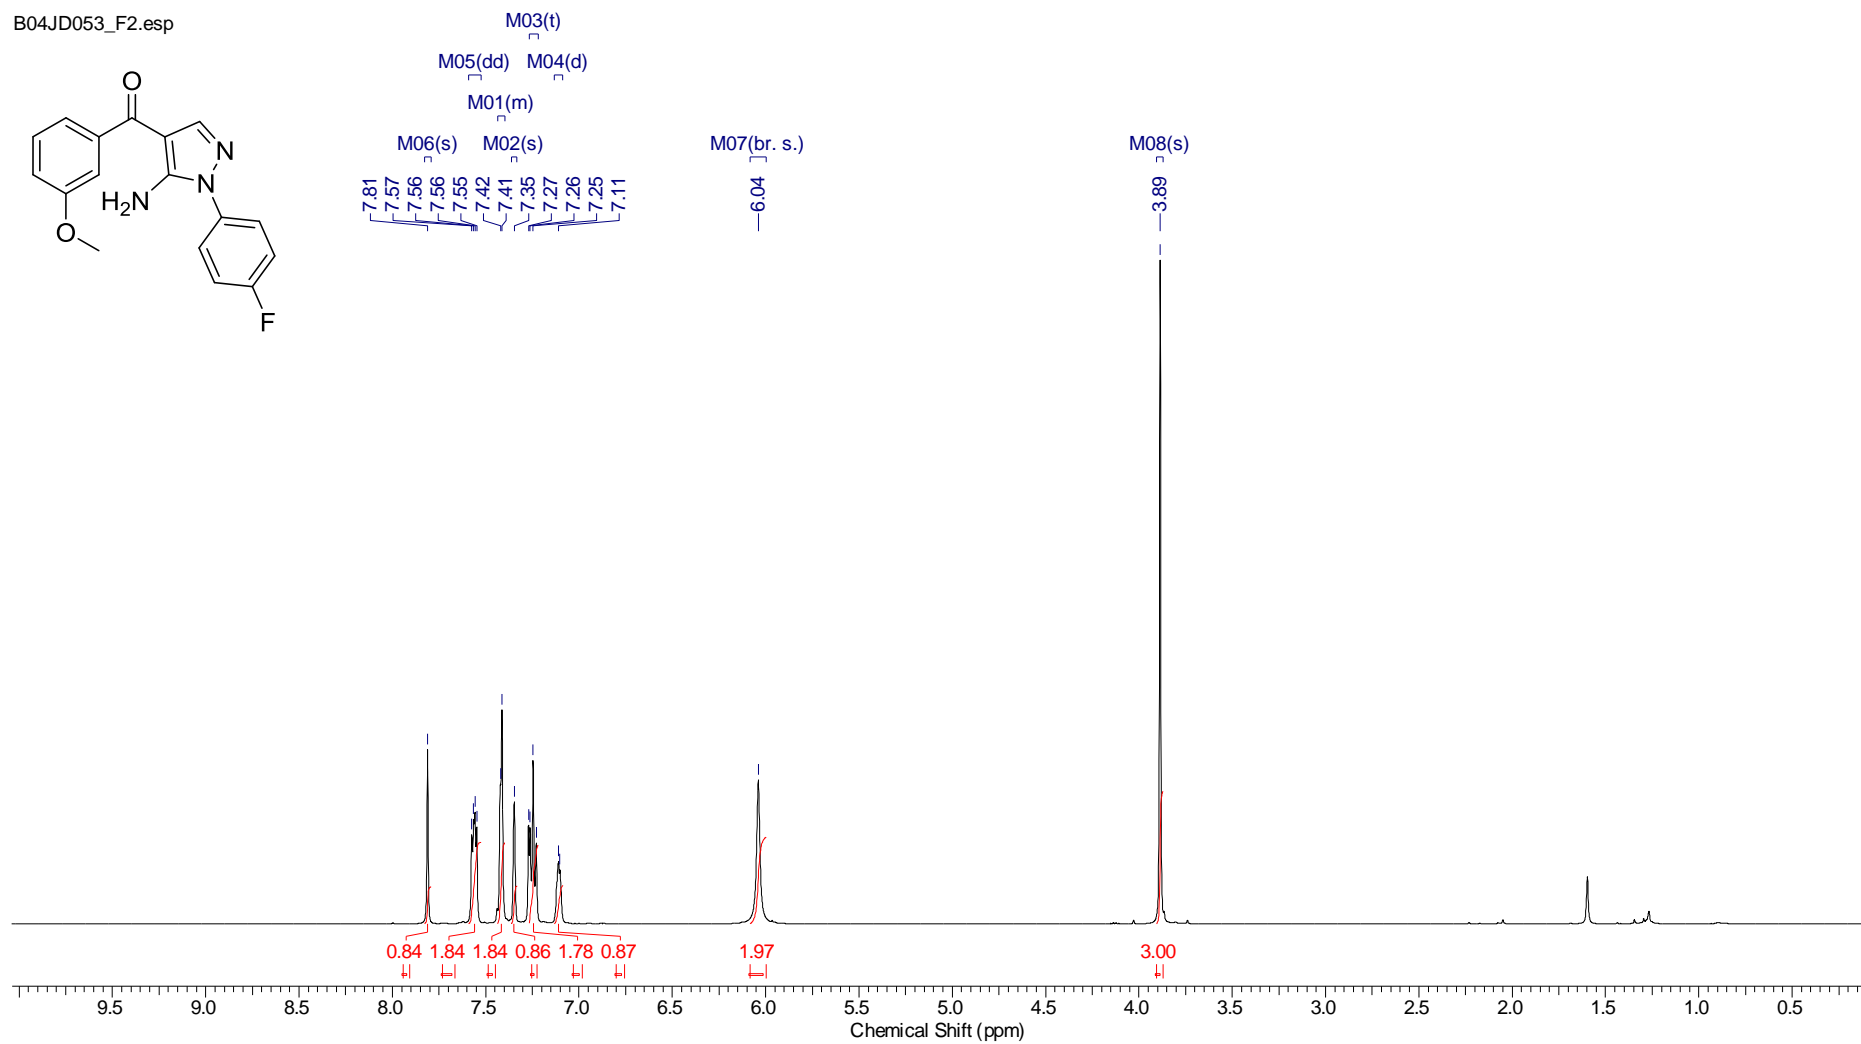

<sup>13</sup>C NMR spectrum (126 MHz, CDCl<sub>3</sub>) for [5-amino-1-(4-fluorophenyl)-1H-pyrazol-4-yl]-3-methoxyphenyl ketone (**12**)

B04JD053\_F2 CARBON in progress.esp

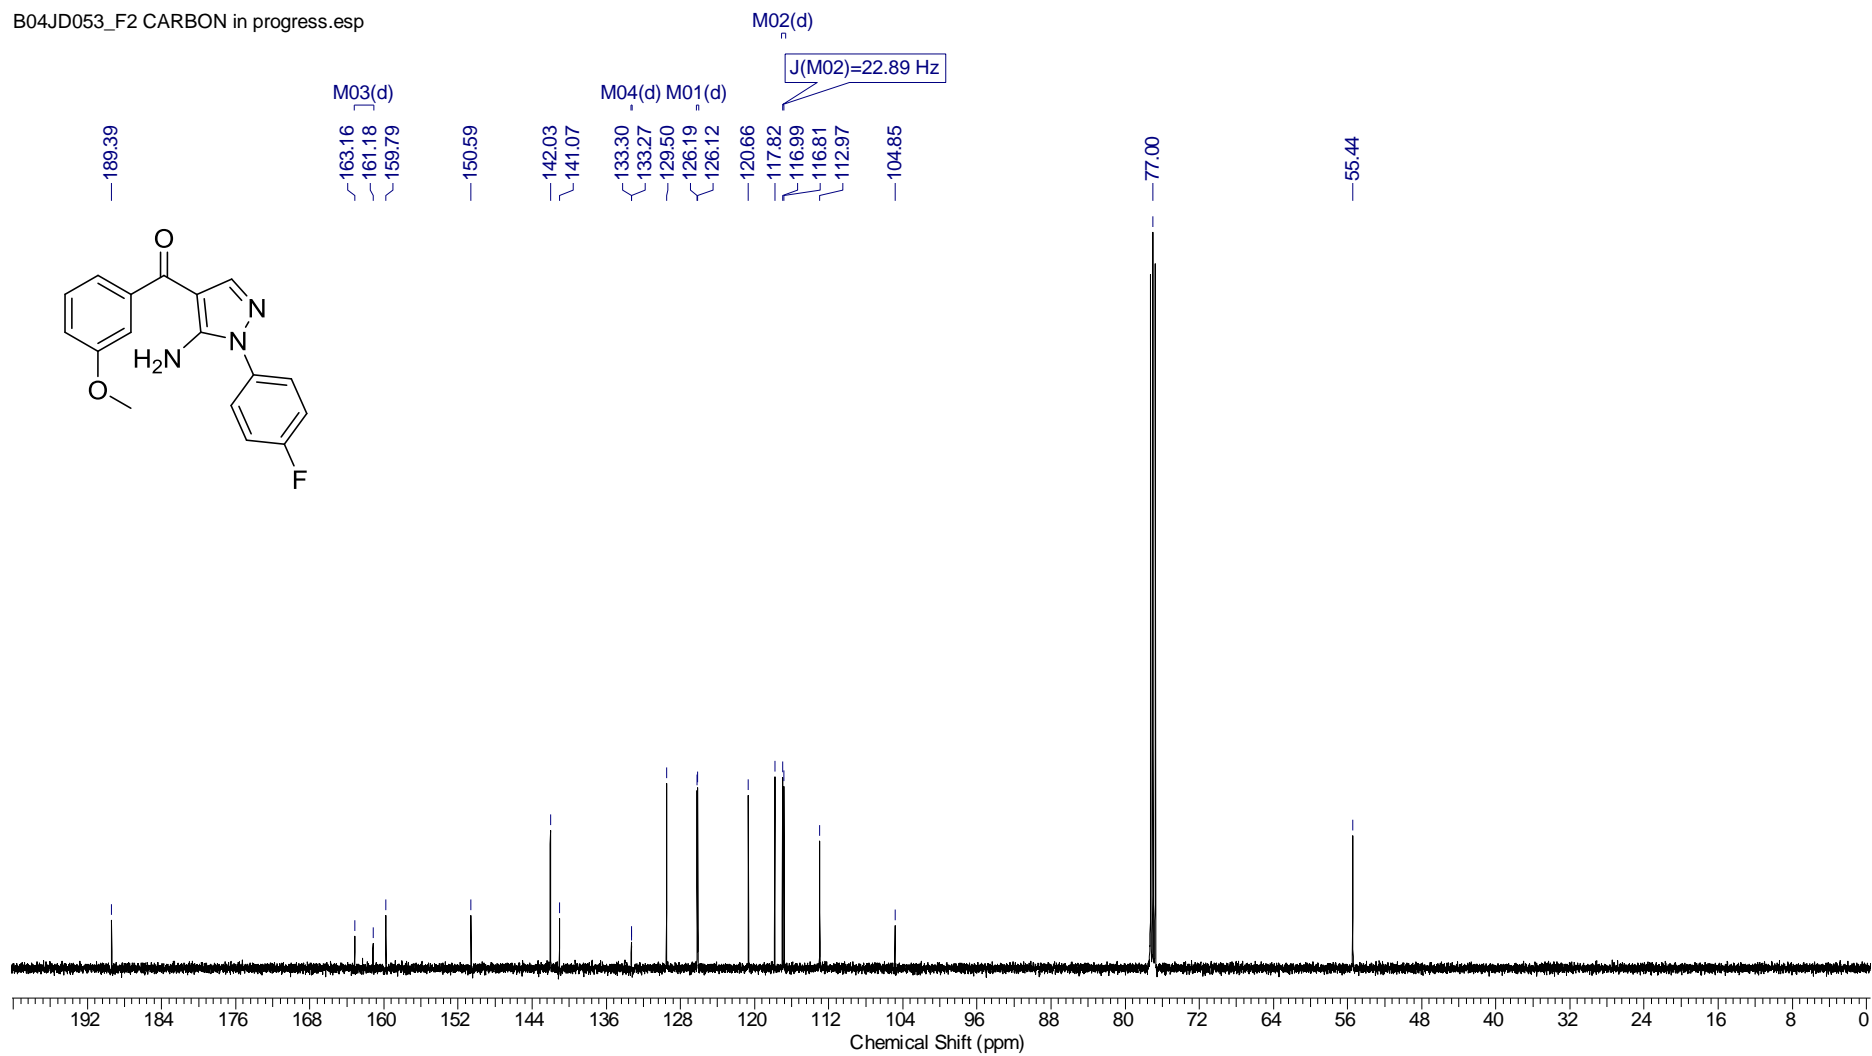

<sup>1</sup>H NMR spectrum (500 MHz, CD<sub>3</sub>OD) for [5-amino-1-(4-fluorophenyl)-1H-pyrazol-4-yl]-3-hydroxyphenyl ketone (**13**)

B04JD054A MeOH.esp

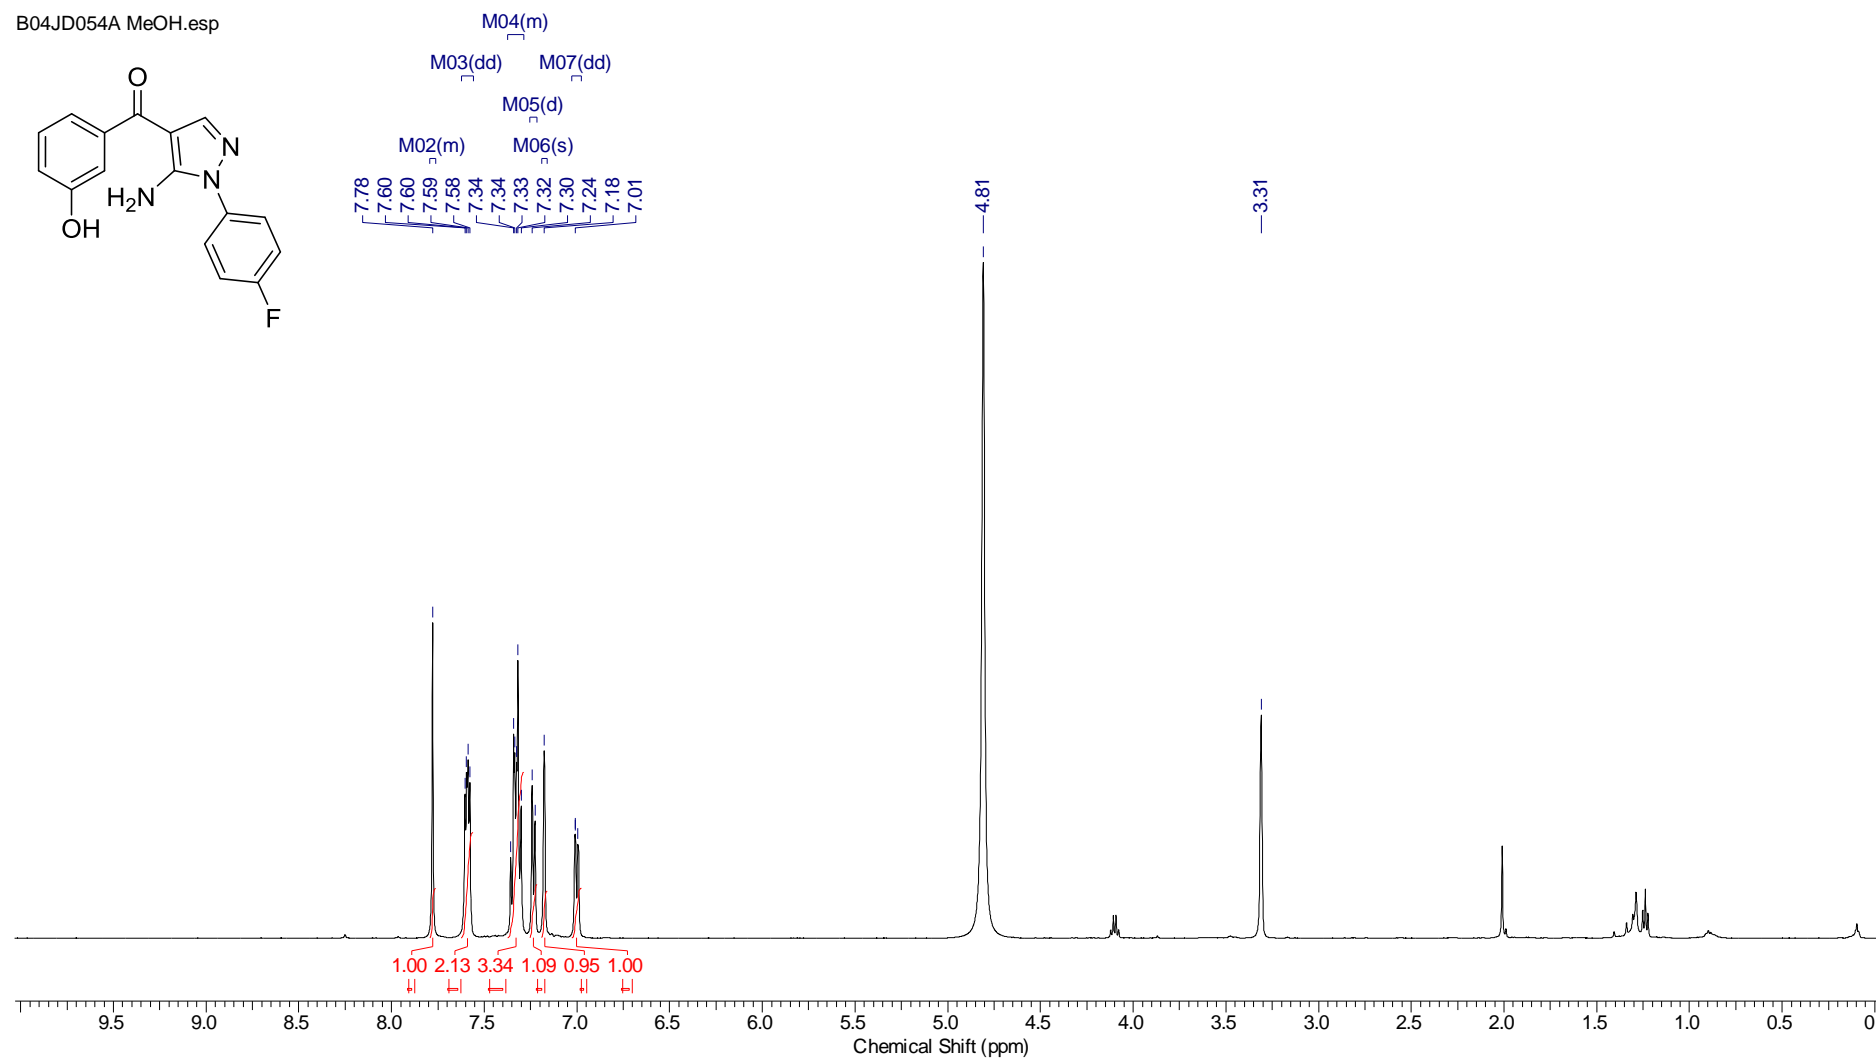

<sup>13</sup>C NMR spectrum (100 MHz, CD<sub>3</sub>OD) for [5-amino-1-(4-fluorophenyl)-1H-pyrazol-4-yl]-3-hydroxyphenyl ketone (**13**)

B04JD054A MeOH CARBON\_01.esy

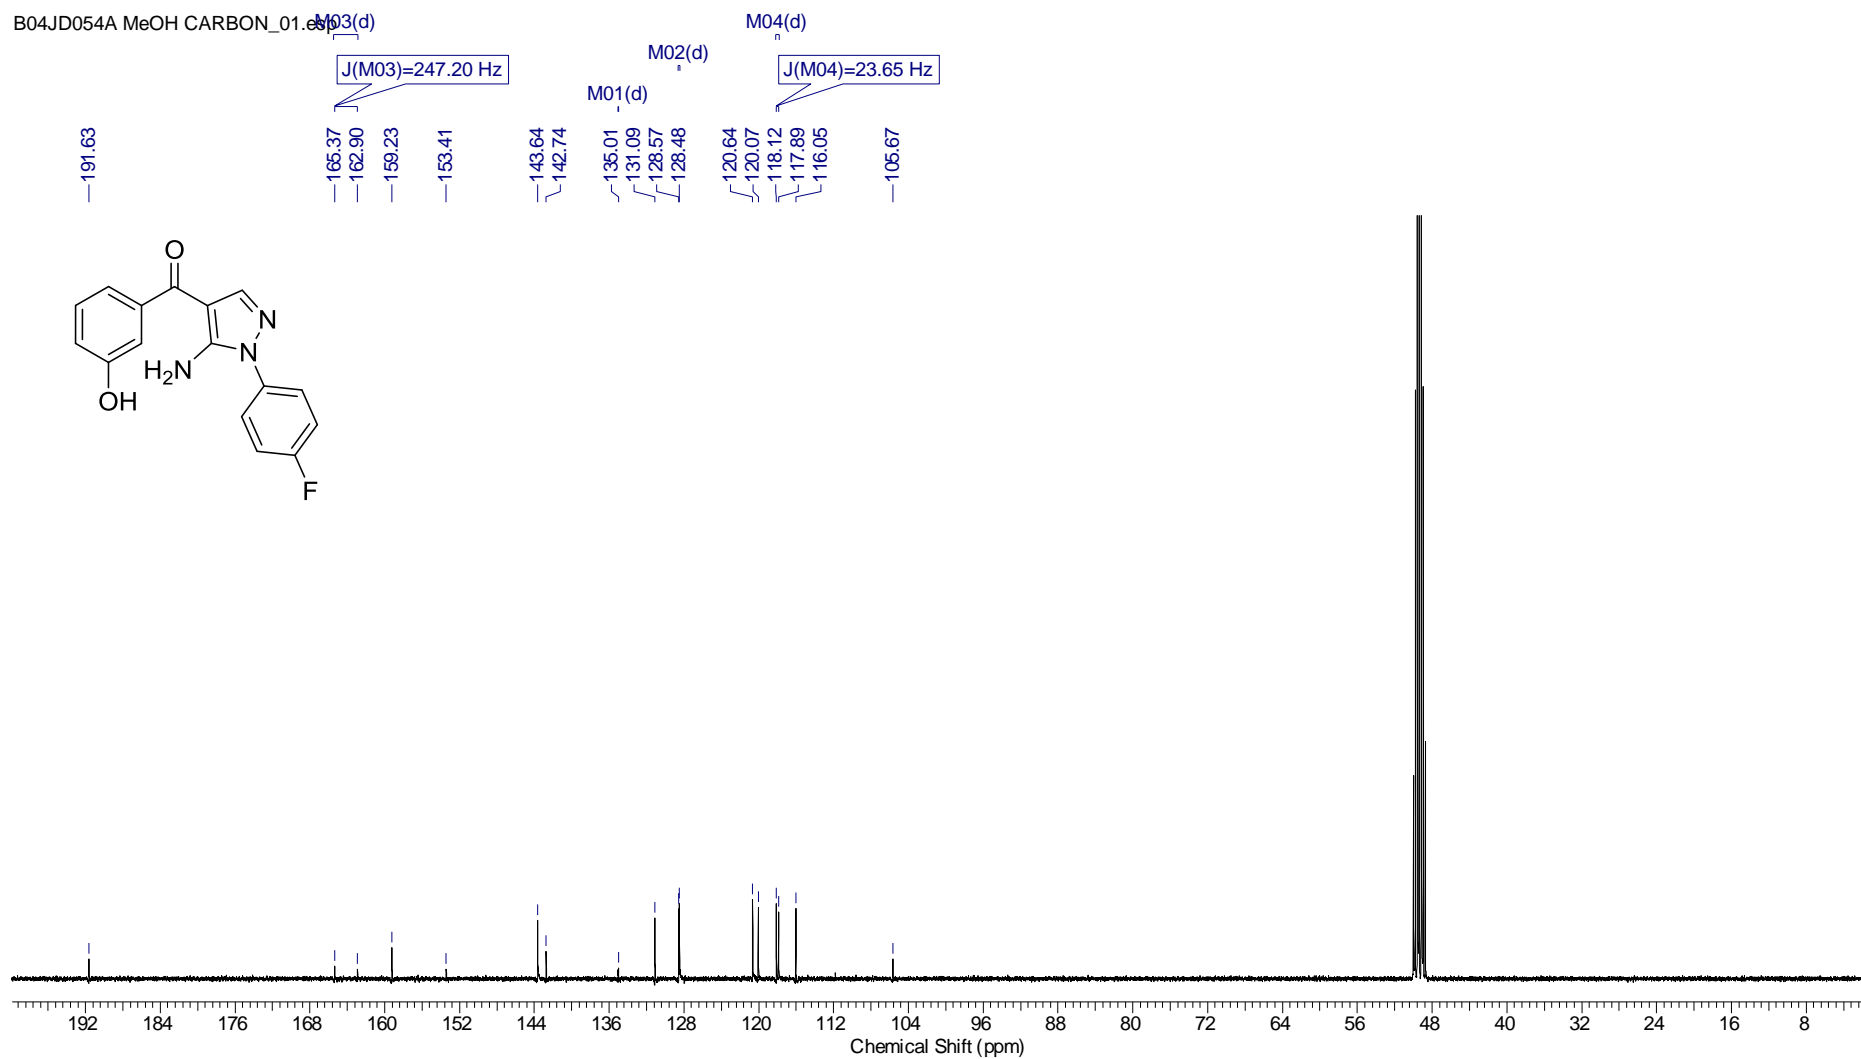

<sup>1</sup>H NMR spectrum (500 MHz, CDCl<sub>3</sub>) for [5-amino-1-(4-fluorophenyl)-1*H*-pyrazol-4-yl]{3-[(*R*)-2,2-dimethyl-1,3-dioxolan-4-yl]methoxy}phenyl} ketone (**15**)

B04JD036C Proton for Carbon CDCl<sub>3</sub>.esp

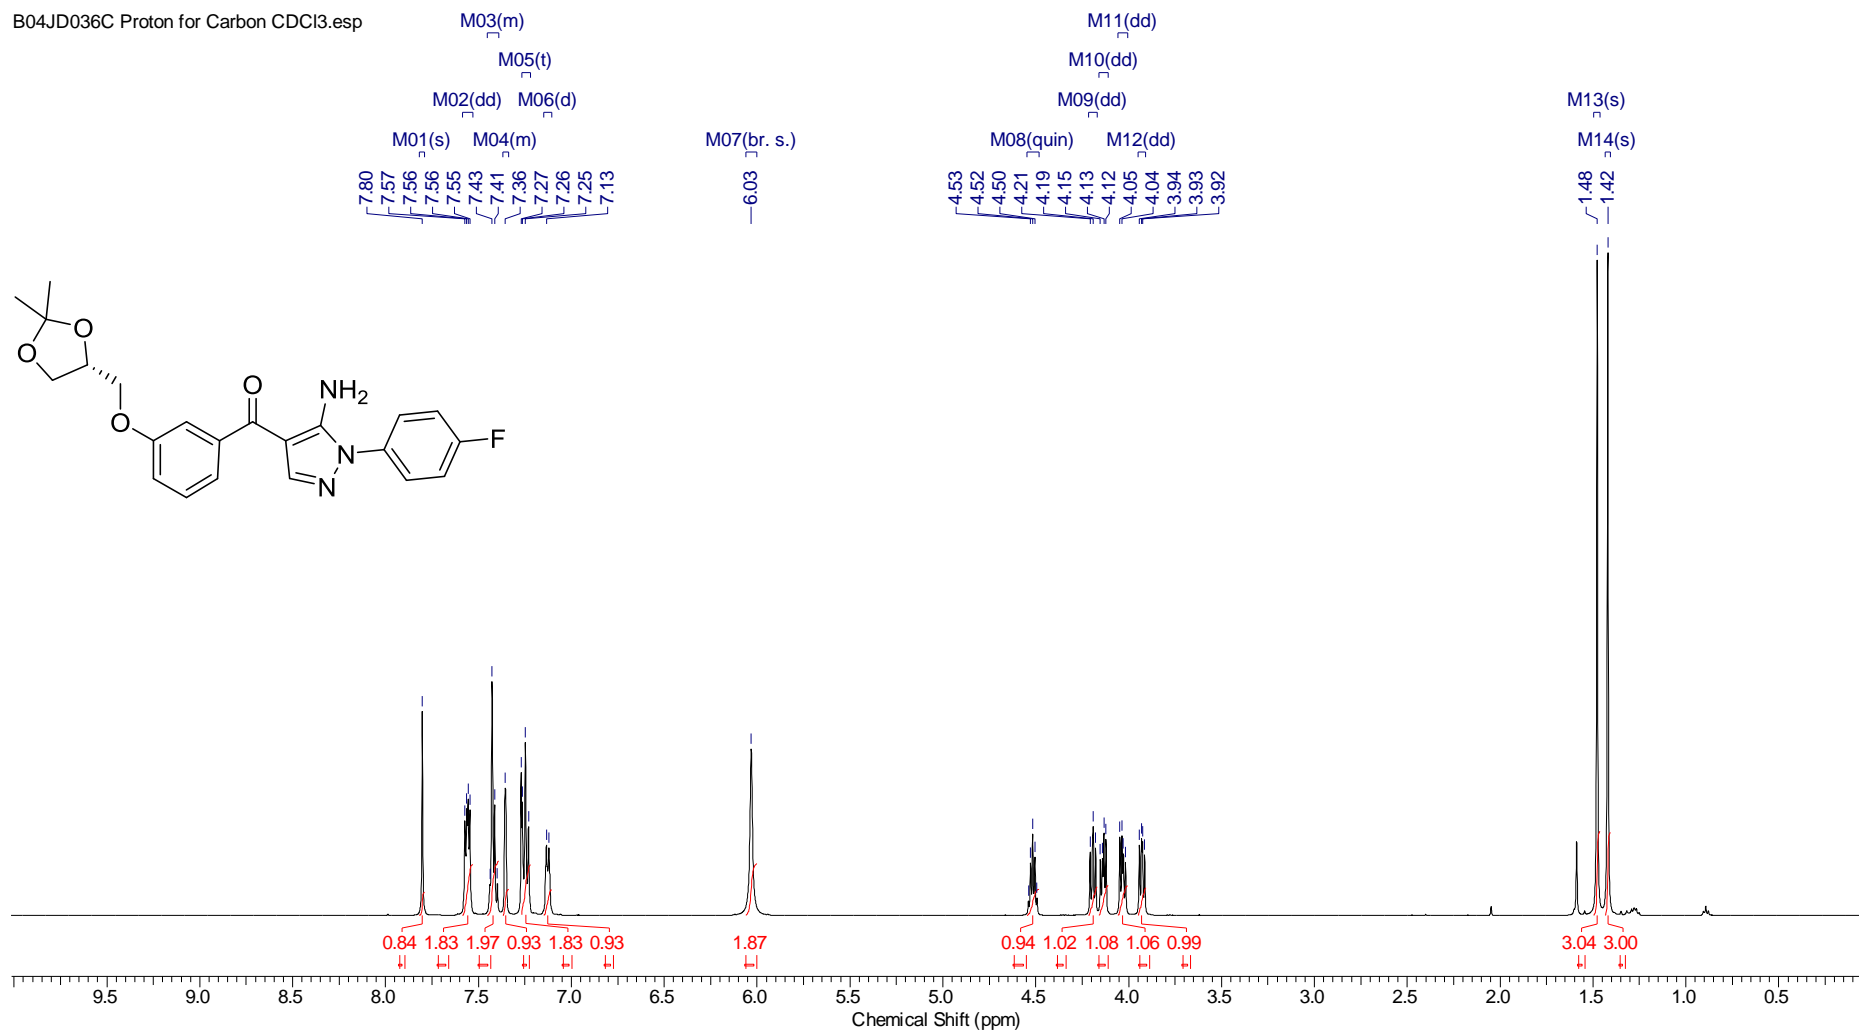



<sup>13</sup>C NMR spectrum (126 MHz, CDCl<sub>3</sub>) for [5-amino-1-(4-fluorophenyl)-1*H*-pyrazol-4-yl]{3-[[*R*]-2,2-dimethyl-1,3-dioxolan-4-yl)methoxy]phenyl} ketone (**15**)

B04JD036C CARBON\_01.esp

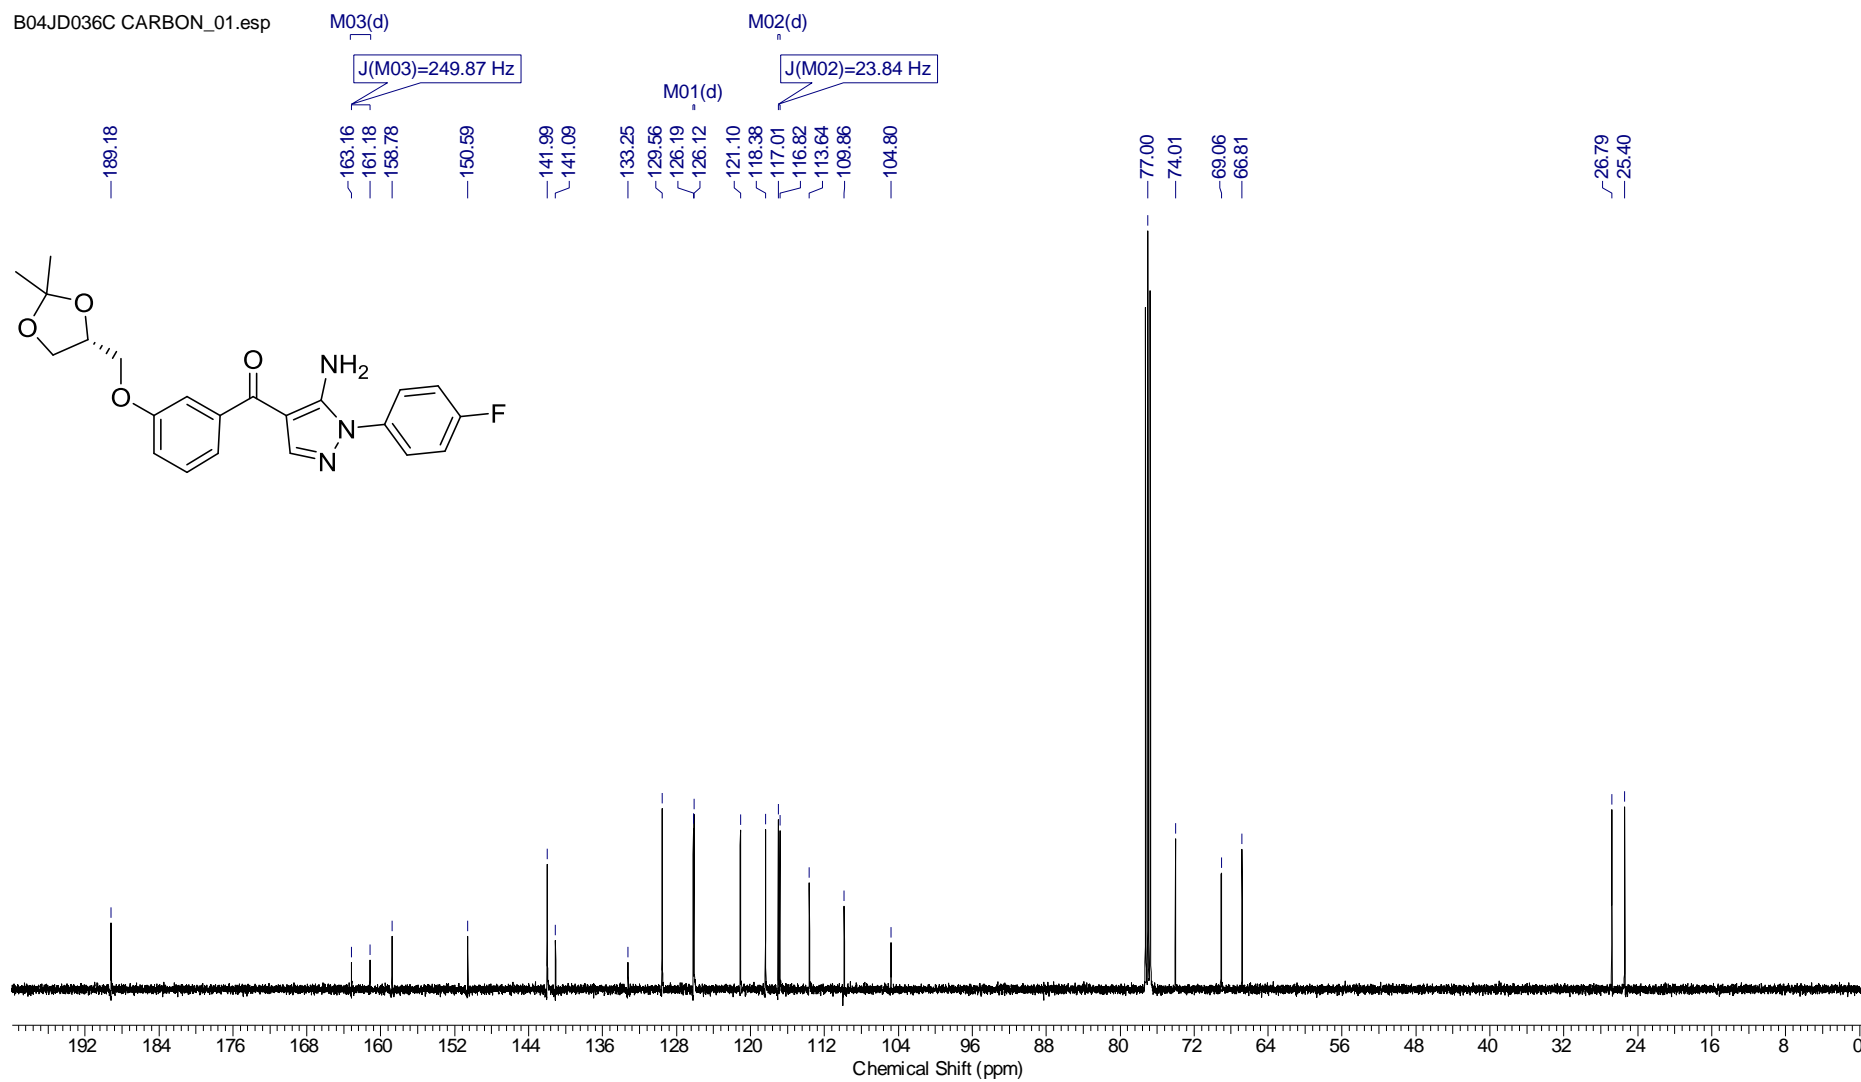

<sup>1</sup>H NMR (500 MHz, DMSO-d<sub>6</sub>) for 5-amino-1-(4-fluorophenyl)-4-{3-[2(S)-3-dihydroxypropoxy]benzoyl}pyrazole (RO3201195) (**1**)

B04JD043A DMSO Proton for carbon.esp

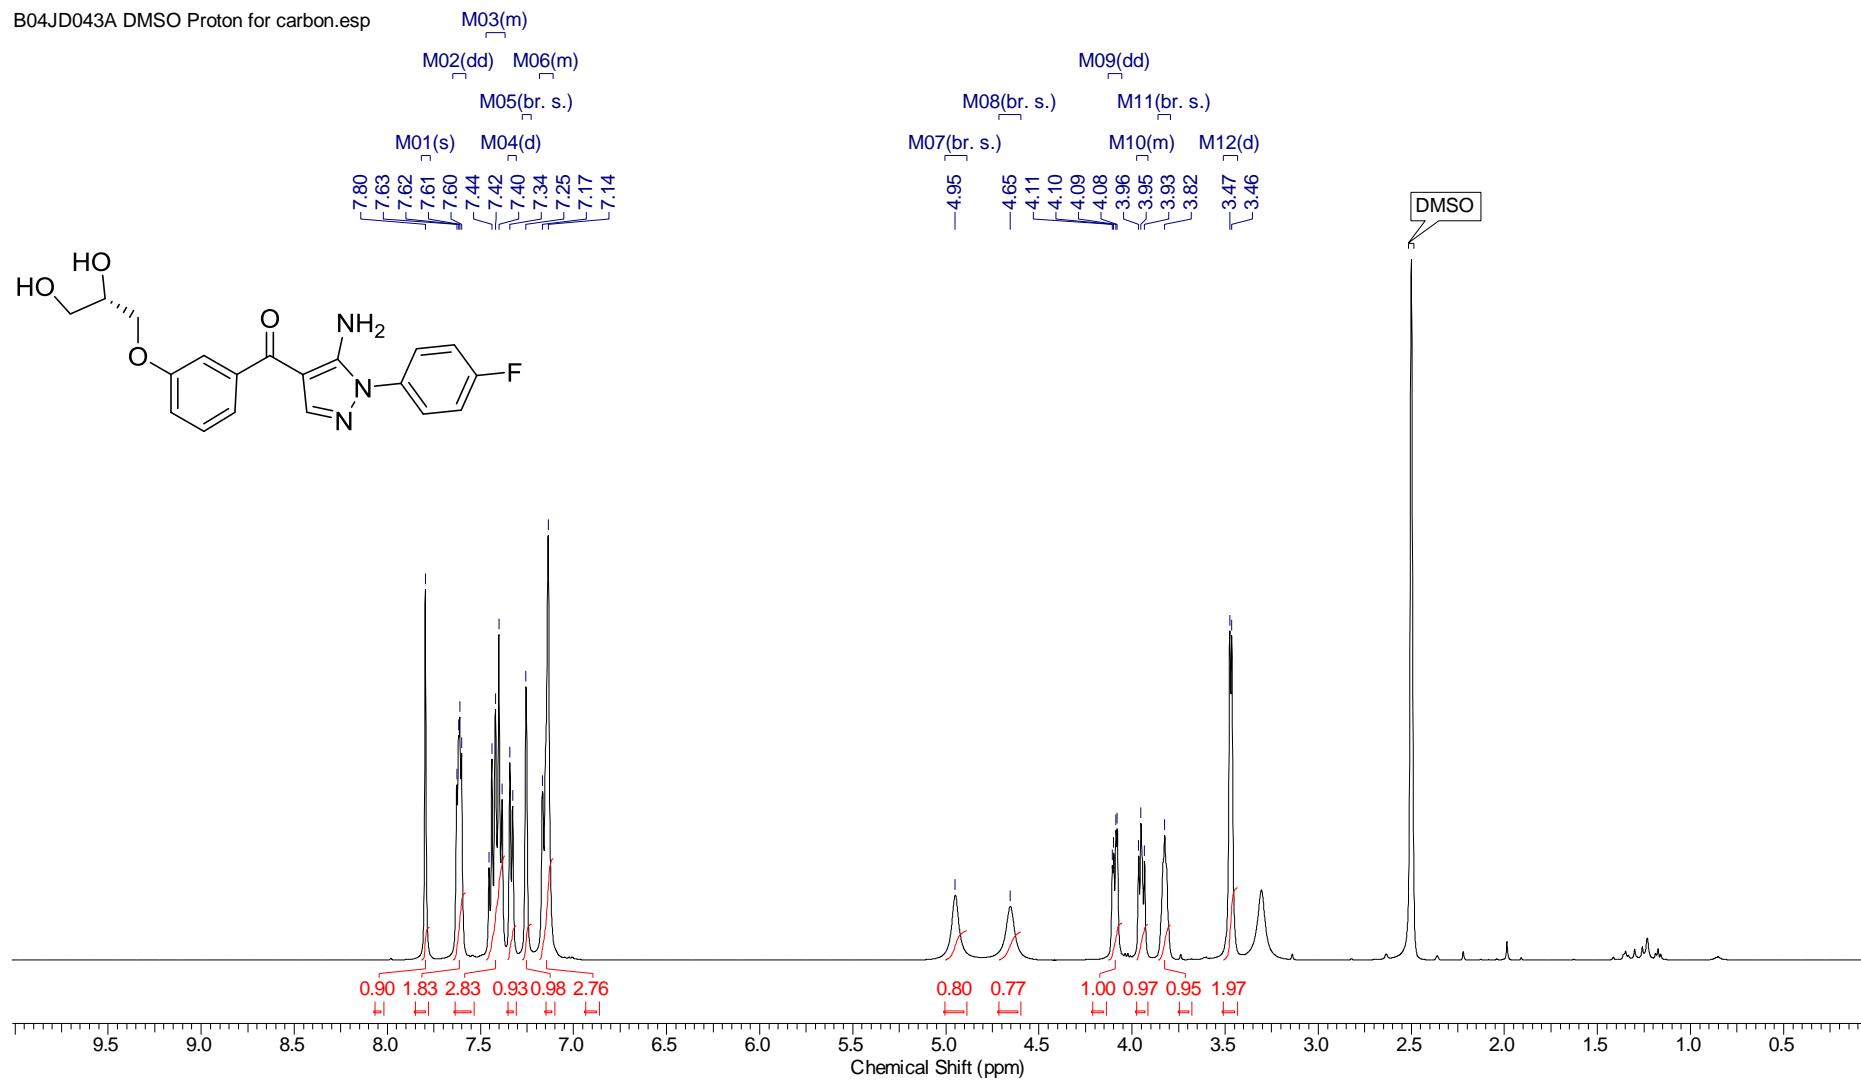

<sup>13</sup>C NMR (126 MHz, DMSO-*d*<sub>6</sub>) for 5-amino-1-(4-fluorophenyl)-4-{3-[2(*S*)-3-dihydroxypropoxy]benzoyl}pyrazole (RO3201195) (1)

B04JD043A DMSO CARBON .esp

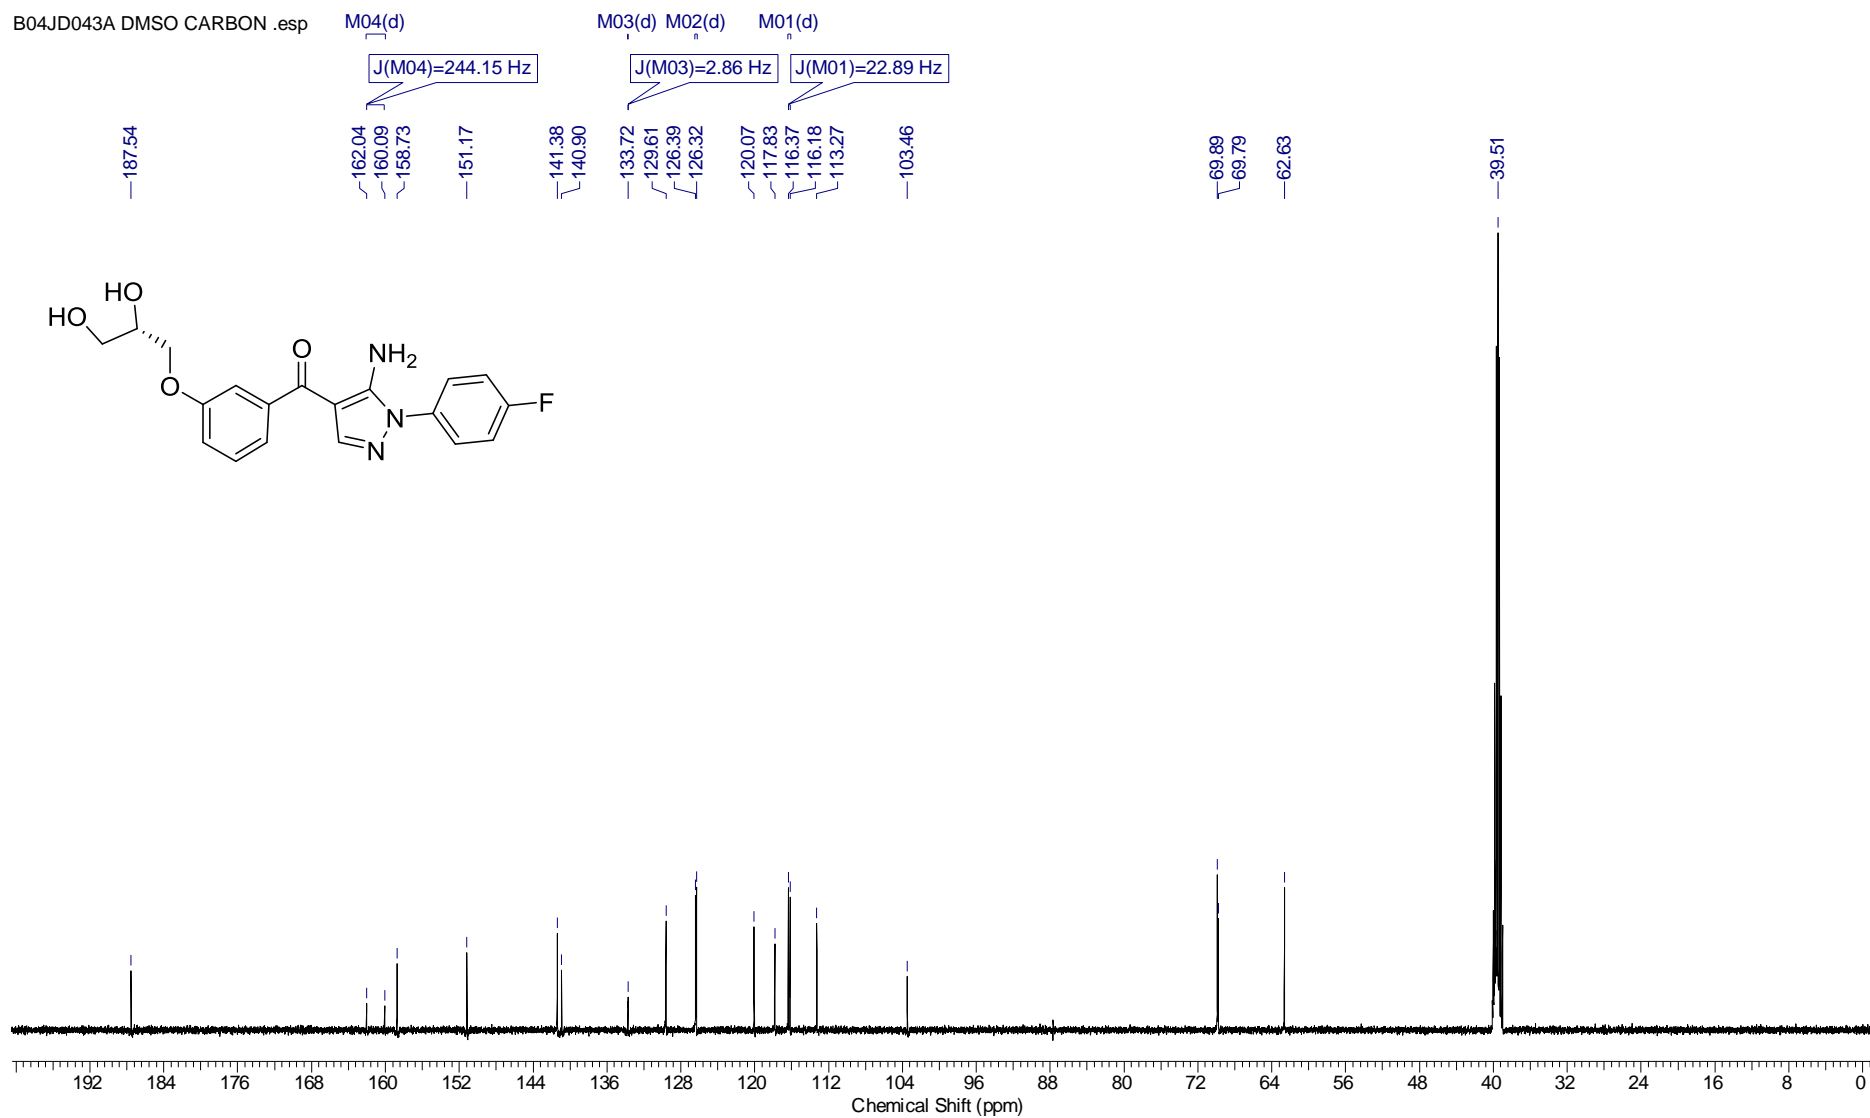

Supplement: c5ob02229k1.pdf [file c5ob02229k1.pdf]
